# Supplementary material
Source: publisher site journal article supplement (https://bdj.pensoft.net/article/download/suppl/3653506/)
Supplement: Supplementary file 1

Archive with 1 entries (1 files):
- doc.kml
