# Supplementary material
Source: publisher site journal article supplement (https://bdj.pensoft.net/article/download/suppl/3653506/)
Supplement: Supplementary file 1 [file  › doc.kml]

<?xml version="1.0" encoding="UTF-8"?>
<kml xmlns="http://www.opengis.net/kml/2.2" xmlns:gx="http://www.google.com/kml/ext/2.2" xmlns:xsi="http://www.w3.org/2001/XMLSchema-instance"
 xsi:schemaLocation="http://www.opengis.net/kml/2.2 http://schemas.opengis.net/kml/2.2.0/ogckml22.xsd http://www.google.com/kml/ext/2.2 http://code.google.com/apis/kml/schema/kml22gx.xsd">
<Document id="Cedrorum_azoricus">
  <name>Cedrorum_azoricus</name>
  <Snippet></Snippet>
  <Folder id="FeatureLayer0">
    <name>Cedrorum_azoricus</name>
    <Snippet></Snippet>
    <Placemark id="ID_00000">
      <name>Cedrorum azoricus</name>
      <Snippet></Snippet>
      <description><![CDATA[<html xmlns:fo="http://www.w3.org/1999/XSL/Format" xmlns:msxsl="urn:schemas-microsoft-com:xslt">

<head>

<META http-equiv="Content-Type" content="text/html">

<meta http-equiv="content-type" content="text/html; charset=UTF-8">

</head>

<body style="margin:0px 0px 0px 0px;overflow:auto;background:#FFFFFF;">

<table style="font-family:Arial,Verdana,Times;font-size:12px;text-align:left;width:100%;border-collapse:collapse;padding:3px 3px 3px 3px">

<tr style="text-align:center;font-weight:bold;background:#9CBCE2">

<td>Cedrorum azoricus</td>

</tr>

<tr>

<td>

<table style="font-family:Arial,Verdana,Times;font-size:12px;text-align:left;width:100%;border-spacing:0px; padding:3px 3px 3px 3px">

<tr>

<td>FID</td>

<td>0</td>

</tr>

<tr bgcolor="#D4E4F3">

<td>Id</td>

<td>0</td>

</tr>

<tr>

<td>ID_NO</td>

<td>0</td>

</tr>

<tr bgcolor="#D4E4F3">

<td>BINOMIAL</td>

<td>Cedrorum azoricus</td>

</tr>

<tr>

<td>PRESENCE</td>

<td>1</td>

</tr>

<tr bgcolor="#D4E4F3">

<td>ORIGIN</td>

<td>1</td>

</tr>

<tr>

<td>SEASONAL</td>

<td>1</td>

</tr>

<tr bgcolor="#D4E4F3">

<td>COMPILER</td>

<td>Anja Danielczak</td>

</tr>

<tr>

<td>YEAR</td>

<td>2017</td>

</tr>

<tr bgcolor="#D4E4F3">

<td>CITATION</td>

<td>Paulo Borges</td>

</tr>

</table>

</td>

</tr>

</table>

</body>

</html>

]]></description>
      <styleUrl>#PolyStyle00</styleUrl>
      <MultiGeometry>
        <Polygon>
          <extrude>0</extrude>          <altitudeMode>clampToGround</altitudeMode>
          <outerBoundaryIs><LinearRing><coordinates> -25.08341452091371,36.95794167209923,0 -25.08331455558406,36.9579323785613,0 -25.08321299012696,36.95792478470403,0 -25.0830052300295,36.95791470805744,0 -25.0827915996019,36.95791145968691,0 -25.08257250012817,36.95791504580424,0 -25.08234831730035,36.95792546201329,0 -25.08211956083851,36.95794268650349,0 -25.08188672693982,36.95796668201994,0 -25.08165035680577,36.95799739289381,0 -25.0814106612104,36.95803480564589,0 -25.08116859506614,36.95807878497388,0 -25.0809247883572,36.95812921649932,0 -25.08067990639072,36.95818596268977,0 -25.08043460261657,36.95824887316854,0 -25.08018960861113,36.95831776137209,0 -25.07994563662347,36.95839242705759,0 -25.07970340968077,36.95847264899219,0 -25.07946345776692,36.95855825904354,0 -25.07922669476242,36.95864893864132,0 -25.07899382830707,36.95874441672984,0 -25.07876554615653,36.95884441130432,0 -25.07854253636313,36.95894862004594,0 -25.0783254139195,36.95905675464042,0 -25.07811478839284,36.95916851141292,0 -25.0779112272245,36.95928358920178,0 -25.07771553404951,36.95940151836792,0 -25.07752790929555,36.9595221622243,0 -25.07734880893495,36.95964522744684,0 -25.07717864093521,36.95977043357564,0 -25.0770970408226,36.95983374059428,0 -25.07701780944102,36.95989748076135,0 -25.07694098757852,36.95996162125876,0 -25.07686661327829,36.96002613031811,0 -25.07679472430734,36.96009097509453,0 -25.07672535260991,36.96015612668323,0 -25.07665853005161,36.96022155515178,0 -25.07659428606886,36.96028723167221,0 -25.07653091676869,36.96035527221098,0 -25.07646861408072,36.96042581846965,0 -25.07640736582662,36.96049888422736,0 -25.07634715850159,36.96057448558511,0 -25.07628798025901,36.96065263719324,0 -25.07622981323316,36.96073336241791,0 -25.07617264115786,36.96081668381493,0 -25.07611644569624,36.9609026280915,0 -25.07606123995572,36.96099117153936,0 -25.0760069687734,36.96108239891213,0 -25.07595360929354,36.9611763485932,0 -25.07590113514394,36.96127306698482,0 -25.07584952453352,36.96137259341874,0 -25.07579873857785,36.96147500204208,0 -25.07574874256407,36.96158036277431,0 -25.07569949499796,36.96168876299427,0 -25.07560636058243,36.96190702685119,0 -25.0755154273181,36.96213798162973,0 -25.07542618072955,36.96238292308621,0 -25.07533772509477,36.96264430340915,0 -25.07525225122957,36.96291456995374,0 -25.07516402169034,36.96321082945282,0 -25.07507208699117,36.96353531961167,0 -25.07494696341633,36.96399215340751,0 -25.0749044729938,36.96415538196682,0 -25.07486557915748,36.96431993058977,0 -25.07483028075163,36.96448580416226,0 -25.07479857666009,36.96465300792598,0 -25.07477046591709,36.96482154689477,0 -25.07474594746724,36.96499142730749,0 -25.07472502043724,36.96516265520739,0 -25.07470768403146,36.96533523709724,0 -25.0746939379084,36.96550917479686,0 -25.07468378095346,36.96568448041887,0 -25.07467721272853,36.96586116150358,0 -25.0746742329297,36.9660392261938,0 -25.07467484140448,36.96621868222377,0 -25.07467903816344,36.96639953945385,0 -25.07468682342569,36.96658180739438,0 -25.07469819763026,36.9667654963581,0 -25.07471315466565,36.96695054195298,0 -25.07473169934439,36.9671370297916,0 -25.07475383287084,36.96732497200554,0 -25.07477955680007,36.96751438181547,0 -25.07480887278277,36.96770527165626,0 -25.07484178329903,36.96789765792254,0 -25.07487829103686,36.96809155634314,0 -25.0749183992404,36.96828698416125,0 -25.07496210758324,36.96848394192512,0 -25.07500942384944,36.96868246667202,0 -25.07506035298453,36.96888257916708,0 -25.07511490082152,36.96908430234248,0 -25.07517307303826,36.96928765745366,0 -25.07523487798746,36.96949267394022,0 -25.07530032411911,36.96969937984888,0 -25.07536942132523,36.96990780643721,0 -25.07544067175904,36.97011371575298,0 -25.07551544946092,36.97032134310298,0 -25.07559376759519,36.97053072505771,0 -25.0756756415401,36.97074190274644,0 -25.07576108562358,36.97095491346749,0 -25.07585012192325,36.97116981258594,0 -25.07594277209,36.97138665238311,0 -25.07603906160365,36.97160549251323,0 -25.07613897376498,36.97182629917762,0 -25.07624258305611,36.97204924098018,0 -25.07634992579084,36.97227439609483,0 -25.07646104531828,36.97250185547777,0 -25.07657597974091,36.97273169784143,0 -25.07669479568795,36.97296405711646,0 -25.07681755688495,36.97319905798389,0 -25.07694434123332,36.97343684961709,0 -25.07707285932087,36.97367326489108,0 -25.07720544359225,36.97391271656247,0 -25.07734220805017,36.97415541062313,0 -25.07748329698176,36.97440160319454,0 -25.07762882058426,36.97465148888009,0 -25.07777904055664,36.97490551926966,0 -25.07793419975707,36.97516410528215,0 -25.07809462715187,36.97542779533833,0 -25.07842844967687,36.97596604373487,0 -25.07878929419523,36.97653467694406,0 -25.07918381249385,36.97714427001175,0 -25.07963799124046,36.97783499736502,0 -25.07975196233353,36.97800277711753,0 -25.07987292928724,36.97817219989264,0 -25.08000114845294,36.97834362531793,0 -25.08013696829471,36.97851751970611,0 -25.08028060905278,36.97869418015382,0 -25.08043283119306,36.97887455595928,0 -25.08059434878581,36.97905949509007,0 -25.08076627758614,36.97925027623347,0 -25.08091321139322,36.97940917574384,0 -25.08106908904243,36.97957426694013,0 -25.08123551312306,36.9797472512104,0 -25.08141568094557,36.97993145383339,0 -25.08175518272729,36.98027242843209,0 -25.08258924007311,36.98110024512037,0 -25.0828148551557,36.98132760329557,0 -25.08301589167529,36.98153343875007,0 -25.0832275805715,36.98175470348374,0 -25.08342254562666,36.98196380252639,0 -25.08360411408737,36.98216430752035,0 -25.08377400303414,36.98235812111641,0 -25.08395139097799,36.98256832118141,0 -25.08411706673532,36.98277347213133,0 -25.084271938952,36.98297470042787,0 -25.08441660877201,36.98317278918719,0 -25.08455170255472,36.98336861308001,0 -25.08467742334795,36.98356248499464,0 -25.08479406691762,36.9837548615937,0 -25.0849018510983,36.98394610292753,0 -25.08495875646357,36.98405347863756,0 -25.08501397729852,36.98416256275149,0 -25.08506753685276,36.98427340117056,0 -25.08511946015445,36.98438604566485,0 -25.08516976928309,36.984500543558,0 -25.08521849534822,36.98461696506106,0 -25.0852656664152,36.98473537718185,0 -25.08531131320062,36.98485585698288,0 -25.08535542037577,36.98497835410639,0 -25.08539807251527,36.98510309321758,0 -25.08543930519111,36.98523017824857,0 -25.08547915831224,36.98535973211585,0 -25.08551766484214,36.98549185954214,0 -25.0855548807141,36.98562674995848,0 -25.08559085497441,36.9857645808938,0 -25.08562564492841,36.98590557170277,0 -25.08568614208951,36.98617118722621,0 -25.08574337816313,36.98645013534453,0 -25.08579789792253,36.98674504113783,0 -25.0858506242566,36.98706087998477,0 -25.08589624138684,36.9873600444967,0 -25.08594329116249,36.98769303408128,0 -25.08598806658181,36.98802898207199,0 -25.0861044951992,36.98892780717626,0 -25.08617543645748,36.98943774967903,0 -25.08621703445189,36.98971146226907,0 -25.08625883249441,36.98996647885363,0 -25.08630163722069,36.99020770824663,0 -25.08634589335478,36.99043763241927,0 -25.08640355862056,36.99071088226538,0 -25.08646455044598,36.99097198032754,0 -25.08652929149341,36.99122273101682,0 -25.08659808711115,36.99146430990767,0 -25.08667131777183,36.99169800497708,0 -25.08674911931476,36.99192420367338,0 -25.08683170283006,36.99214351856553,0 -25.08691924312931,36.99235641248063,0 -25.08700618689235,36.99256327835637,0 -25.0870998629136,36.99279470432055,0 -25.08720307276637,36.99305725224393,0 -25.08751640872206,36.99386586337634,0 -25.0876195670351,36.99412361101979,0 -25.08771469769558,36.99435324738406,0 -25.08782801135981,36.9946145323074,0 -25.08793835918634,36.99485472077152,0 -25.08804782839881,36.99507834671127,0 -25.08815750554876,36.99528761108553,0 -25.08822181355497,36.99540351853687,0 -25.08828661324804,36.99551535000406,0 -25.08835201904923,36.99562330279503,0 -25.08841812396294,36.99572753021456,0 -25.08848503203722,36.99582819430412,0 -25.08855279835337,36.99592537592415,0 -25.08862149090621,36.99601917251271,0 -25.08869116797822,36.99610966356796,0 -25.08876197212718,36.9961970257536,0 -25.08883386701574,36.99628120586834,0 -25.08890689887816,36.99636225801029,0 -25.08898110865416,36.99644022757354,0 -25.08905654118712,36.9965151611769,0 -25.0891332264023,36.9965870880554,0 -25.08921119833992,36.99665604011656,0 -25.08929048780925,36.99672204458281,0 -25.08943081720445,36.99683061670859,0 -25.08957980207833,36.99693680094777,0 -25.08973729622564,36.99704049301026,0 -25.08990313058323,36.99714158150962,0 -25.09007714126998,36.99723996509592,0 -25.09025909703971,36.9973355116457,0 -25.09044876760046,36.99742810014259,0 -25.09064589116723,36.99751760271452,0 -25.09085045273388,36.99760399997775,0 -25.09106188438395,36.99768703994016,0 -25.09127984446395,36.99776658832971,0 -25.09150395177776,36.99784250593933,0 -25.09173383770293,36.99791466647106,0 -25.09196902051739,36.99798291732469,0 -25.09220902889094,36.99804712163996,0 -25.09245334923972,36.99810714195039,0 -25.09270394090278,36.99816338070217,0 -25.09295778934678,36.99821508341861,0 -25.09321427901156,36.99826212466479,0 -25.09347275877496,36.9983043849565,0 -25.09373258696021,36.99834175857797,0 -25.09399304410274,36.99837414123296,0 -25.09425342661209,36.9984014454199,0 -25.09451301714992,36.99842359588322,0 -25.09477113409042,36.99844053334873,0 -25.09502702065299,36.99845220702737,0 -25.09527996475609,36.99845858445349,0 -25.09552926901801,36.99845964805294,0 -25.0957742334606,36.99845539545481,0 -25.09601422136397,36.99844583832855,0 -25.09624859953835,36.99843100195055,0 -25.09647677200164,36.99841092410067,0 -25.09667031931599,36.99838974450685,0 -25.0968662073852,36.99836502944176,0 -25.09706383236664,36.99833685515257,0 -25.09726261814028,36.99830530382865,0 -25.09746195789637,36.99827047287395,0 -25.09766136622991,36.99823244818946,0 -25.09786033170126,36.99819132736707,0 -25.09805838284533,36.99814720791257,0 -25.09825468564689,36.99810028502428,0 -25.09844921711263,36.9980505736657,0 -25.0986415867974,36.99799817367352,0 -25.09883144295229,36.99794318092543,0 -25.09901841783581,36.99788570292294,0 -25.09920224941752,36.9978258212183,0 -25.09938265720023,36.99776362723278,0 -25.09955939204691,36.9976992069101,0 -25.09973036036918,36.9976333814122,0 -25.09989730647251,36.99756553829023,0 -25.10006004310488,36.99749575367931,0 -25.10021840508209,36.99742409845803,0 -25.10037222241171,36.99735065018825,0 -25.1005213765218,36.99727546615461,0 -25.10066574145995,36.99719860987889,0 -25.10080520667286,36.99712014025387,0 -25.10093957698513,36.99704017172926,0 -25.10106886256654,36.99695870306123,0 -25.10119298066072,36.996875786426,0 -25.10131185893572,36.99679147017602,0 -25.10142542457043,36.99670580641757,0 -25.1015336263453,36.99661883426646,0 -25.10163641104574,36.99653059652054,0 -25.10173373242963,36.996441132905,0 -25.10180384979809,36.99637276590499,0 -25.10187316443709,36.99630198106087,0 -25.10194164693997,36.99622880839198,0 -25.10200926613666,36.99615328119261,0 -25.10207599292049,36.9960754317643,0 -25.10214179099746,36.99599530223965,0 -25.10220662620149,36.99591293421199,0 -25.10227046238015,36.9958283735963,0 -25.10233329027919,36.99574163030997,0 -25.10239504271004,36.99565279473752,0 -25.10245568032407,36.99556192346616,0 -25.10251516163458,36.99546907864946,0 -25.10257344808874,36.99537432010977,0 -25.10263049203427,36.99527772495557,0 -25.10268624898193,36.99517936849853,0 -25.10274067232621,36.99507933292799,0 -25.10279398216012,36.99497718201155,0 -25.10284584781524,36.99487351680752,0 -25.10289621961827,36.99476843656819,0 -25.10294504605443,36.99466204872702,0 -25.1029922793934,36.99455445670545,0 -25.10303786291776,36.994445789102,0 -25.10308174425368,36.99433617073438,0 -25.10312386993132,36.99422573513499,0 -25.10316421532149,36.99411454105992,0 -25.10320269664212,36.99400281334337,0 -25.10323926196485,36.99389070271315,0 -25.10327385948301,36.99377836796464,0 -25.10330644145775,36.99366596335028,0 -25.10333695622416,36.99355366630925,0 -25.1033653569977,36.99344164897043,0 -25.10339159866824,36.99333008920595,0 -25.10341938855725,36.99319588357219,0 -25.10344293465382,36.99305796147979,0 -25.10346227339638,36.99291611087988,0 -25.1034774425514,36.99277005607886,0 -25.10348846782149,36.99261960843425,0 -25.10349539514001,36.99246422071703,0 -25.10349824753676,36.99230339228672,0 -25.10349703842425,36.99213639391144,0 -25.10349219616973,36.99197304682062,0 -25.10348372881759,36.99180229423942,0 -25.10347156668431,36.99162266802747,0 -25.10345552209293,36.9914313731328,0 -25.10343723074232,36.99124338433042,0 -25.10341466525794,36.99103441282862,0 -25.10333511776335,36.99036030344275,0 -25.10332066439081,36.99024539837208,0 -25.10330403447694,36.99012968103966,0 -25.10328522030899,36.99001309768887,0 -25.10326421213601,36.98989558782796,0 -25.10324100047738,36.98977709697125,0 -25.10321556948885,36.98965754292978,0 -25.10318790271105,36.9895368482284,0 -25.10315797971381,36.98941492366376,0 -25.10312582176072,36.98929183976488,0 -25.10309136123967,36.98916732279729,0 -25.10301539128733,36.9889134867172,0 -25.10292973375711,36.9886522860474,0 -25.10283383731488,36.98838203578386,0 -25.1027457656435,36.98814891018449,0 -25.1026493651361,36.98790612351428,0 -25.10254367576331,36.98765124474444,0 -25.10242675393206,36.9873795805475,0 -25.10231858948334,36.98713535815176,0 -25.10219594158909,36.98686423620995,0 -25.1017596946889,36.98591864529186,0 -25.10158962211606,36.98554501792227,0 -25.10142034777697,36.98516203928715,0 -25.10127407777884,36.9848165753675,0 -25.10119411548247,36.98461960684615,0 -25.10111969761235,36.98442954568512,0 -25.10105034081494,36.98424515615699,0 -25.10098573593833,36.98406561434297,0 -25.10092556015803,36.9838900071029,0 -25.10086971937605,36.98371804234527,0 -25.10081806768427,36.98354927022771,0 -25.10077049940091,36.98338334471819,0 -25.10071599718695,36.98317944550872,0 -25.1006639694206,36.98297056712263,0 -25.10061430609333,36.98275626897421,0 -25.10056687275425,36.98253597176498,0 -25.10052158276483,36.98230930690559,0 -25.10047818856932,36.98207507015433,0 -25.1004364867059,36.98183216825048,0 -25.10039619040322,36.98157893426674,0 -25.10036447197984,36.98136564530689,0 -25.10033317640653,36.98114242770981,0 -25.10027028569106,36.98065483013465,0 -25.1002146292616,36.98018435212739,0 -25.10008421074336,36.97903390688008,0 -25.10004642795624,36.97871845260166,0 -25.10001053571921,36.97843463192389,0 -25.0999694242516,36.97813041722073,0 -25.09992787880426,36.97784571353006,0 -25.09988518066444,36.97757560819843,0 -25.09984091809804,36.97731751985765,0 -25.09978864256641,36.97703811323878,0 -25.09973357095002,36.97676951843243,0 -25.09967539227476,36.97651022226977,0 -25.09961387408482,36.9762591935576,0 -25.0995487313611,36.97601530470421,0 -25.09947985143862,36.97577816797809,0 -25.09940706879217,36.975547214427,0 -25.0993302445523,36.97532200449663,0 -25.09922473884471,36.97503294511036,0 -25.09911272583731,36.97474254882505,0 -25.09899417373877,36.97445073316791,0 -25.09886904530388,36.97415740641475,0 -25.09873730528521,36.9738624849747,0 -25.09859890016273,36.97356584812538,0 -25.09845377678052,36.97326738187252,0 -25.09830187249859,36.97296695733093,0 -25.09814322490817,36.97266463747561,0 -25.09797765470582,36.97236006975679,0 -25.09780507175647,36.9720530882738,0 -25.09762536825832,36.97174350119431,0 -25.09743844882802,36.97143114225669,0 -25.09724414709087,36.97111573158764,0 -25.09704230266864,36.970797008688,0 -25.09683271851543,36.97047466228543,0 -25.09662168946803,36.97015801197188,0 -25.09640290957173,36.96983725011999,0 -25.09617609547802,36.96951196104265,0 -25.09594088519223,36.9691816253791,0 -25.09569700863613,36.96884585765,0 -25.09544378948021,36.96850372082358,0 -25.0951805975576,36.96815436280363,0 -25.0949065563593,36.9677966196644,0 -25.09462823575424,36.96743884285486,0 -25.09433720043539,36.96706997526451,0 -25.09403169529856,36.96668779000459,0 -25.09370876593887,36.96628858974194,0 -25.09337152237053,36.96587608051954,0 -25.0930061252155,36.96543320867099,0 -25.09211515262441,36.96436486176177,0 -25.09188453908947,36.96408447632357,0 -25.09163233859537,36.96376792683851,0 -25.09138264060512,36.963447293613,0 -25.09071965435593,36.96258686994727,0 -25.09051936771061,36.96233148871322,0 -25.09033736180831,36.96210375335066,0 -25.09012832688671,36.96184870831458,0 -25.08992936541243,36.9616136199619,0 -25.089736725967,36.9613940606978,0 -25.08954846346948,36.9611878238079,0 -25.08943454130269,36.96106723766833,0 -25.08932143089345,36.96095075343289,0 -25.08920890435134,36.96083813653594,0 -25.08909677954573,36.96072920485585,0 -25.08898485621917,36.96062376540626,0 -25.08887303046193,36.96052172188688,0 -25.08876117466958,36.96042295791249,0 -25.08864918087854,36.96032737822358,0 -25.08853679207658,36.96023477039329,0 -25.0884240759479,36.96014519710553,0 -25.08831094982918,36.96005859269986,0 -25.08819734129065,36.95997490176232,0 -25.08808317215507,36.95989406712614,0 -25.08796839055868,36.95981605249505,0 -25.08785293809291,36.95974081818781,0 -25.08773676234724,36.95966833007133,0 -25.08742541511092,36.95948190646865,0 -25.08711915565163,36.95930575637279,0 -25.08681799992338,36.95913988908566,0 -25.08652204839309,36.95898436025755,0 -25.08623139148913,36.95883921815505,0 -25.08594616608084,36.95870453192659,0 -25.08580562627066,36.95864112691679,0 -25.08566648639913,36.95858035549102,0 -25.08552875972166,36.95852222343795,0 -25.08539245886322,36.95846673608565,0 -25.08525762803506,36.95841391069428,0 -25.08512424622046,36.95836373828386,0 -25.084992324675,36.95831622308741,0 -25.08486187401243,36.9582713689268,0 -25.08473290506344,36.95822917951129,0 -25.08460542693584,36.95818965780528,0 -25.08447944899051,36.9581528067101,0 -25.08435498002987,36.95811862879976,0 -25.08423203271987,36.95808712743626,0 -25.08411061080608,36.95805830346185,0 -25.08399072202707,36.95803215871293,0 -25.08387237365779,36.95800869477515,0 -25.08375557310238,36.95798791310435,0 -25.08364032659314,36.95796981479713,0 -25.08352664052476,36.95795440085709,0 -25.08341452091371,36.95794167209923,0</coordinates></LinearRing></outerBoundaryIs>
        </Polygon>
        <Polygon>
          <extrude>0</extrude>          <altitudeMode>clampToGround</altitudeMode>
          <outerBoundaryIs><LinearRing><coordinates> -27.21519202864156,38.76925987297977,0 -27.21530323117798,38.76924760405664,0 -27.21541512940869,38.76923323359831,0 -27.21552777729898,38.76921675468755,0 -27.21564123571853,38.76919815843166,0 -27.21575555922654,38.76917743616236,0 -27.21587083110671,38.76915457305361,0 -27.21598712967359,38.7691295535946,0 -27.21610454542664,38.76910235833505,0 -27.21622299961978,38.76907300978058,0 -27.21634277795025,38.76904144136284,0 -27.2165868219783,38.76897150710691,0 -27.21683783725116,38.76889222535201,0 -27.21709758253443,38.76880304196124,0 -27.21731331377446,38.76872399768375,0 -27.21753792915211,38.7686374384236,0 -27.21777375843652,38.76854247151368,0 -27.2180253773308,38.7684372568274,0 -27.21824544922673,38.7683425697154,0 -27.21849004964117,38.76823512481334,0 -27.21930296903352,38.76787120902747,0 -27.2196064213003,38.76773685112539,0 -27.21990749304683,38.7676066746232,0 -27.22017980837135,38.76749282608449,0 -27.22046702961878,38.7673779476001,0 -27.22073800872613,38.76727551106641,0 -27.22099722624131,38.76718382608554,0 -27.22124708367293,38.76710204983202,0 -27.22137772270134,38.76706210508132,0 -27.22150643309756,38.76702475854209,0 -27.22163340754417,38.76698995435533,0 -27.22175880396246,38.76695764929578,0 -27.22188279231798,38.76692780024926,0 -27.22200546874126,38.76690038476087,0 -27.22212694605869,38.7668753776428,0 -27.22224732077617,38.7668527590598,0 -27.22236680321069,38.76683249282194,0 -27.2224853496869,38.76681458969888,0 -27.22260303404057,38.76679903855557,0 -27.22271992121236,38.76678583082872,0 -27.22283607998486,38.76677495897449,0 -27.22295155745792,38.76676641881591,0 -27.22306640547373,38.76676020652916,0 -27.22318067053783,38.76675631961009,0 -27.22333062342953,38.76675507152691,0 -27.22348835957876,38.76675833748554,0 -27.22365552938469,38.76676614603576,0 -27.223835429577,38.76677864850524,0 -27.22399236417745,38.76679230095949,0 -27.22416769242818,38.76680979873594,0 -27.2247394251248,38.76687357539895,0 -27.22494466618845,38.76689519199157,0 -27.22514174905271,38.76691336025451,0 -27.22531917698779,38.76692653079055,0 -27.22549301784235,38.76693558326473,0 -27.22565596292096,38.76693978457659,0 -27.22581040300112,38.76693919424859,0 -27.22595764943763,38.76693380321871,0 -27.22615167812702,38.76692062155168,0 -27.22634715462636,38.76690202726751,0 -27.22654408773057,38.7668780195343,0 -27.22674248785082,38.76684859708702,0 -27.22694236390105,38.76681375870017,0 -27.22714373150854,38.76677350174482,0 -27.2273466050848,38.7667278233475,0 -27.22755100178832,38.76667671965141,0 -27.22775690208515,38.76662019694538,0 -27.22796436573665,38.76655824021697,0 -27.22817341685803,38.76649084227745,0 -27.22838408449806,38.76641799377259,0 -27.22859639266023,38.76633968668206,0 -27.22881038728207,38.76625590433769,0 -27.22902611037987,38.76616663031344,0 -27.22924361356515,38.76607184327067,0 -27.22946122545363,38.76597232723032,0 -27.22968071441094,38.76586732852582,0 -27.22990215665487,38.76575681074394,0 -27.23012564861274,38.76564072579803,0 -27.23035126161672,38.7655190377868,0 -27.23057917017225,38.76539165371193,0 -27.2308095309497,38.76525848612295,0 -27.2310425528275,38.76511941436011,0 -27.23127728053953,38.76497504124908,0 -27.23151520562732,38.76482448159354,0 -27.23175670845758,38.764667495072,0 -27.23200234869632,38.76450371813789,0 -27.23225227899315,38.76433306221195,0 -27.23250807286361,38.76415446551813,0 -27.23277107036374,38.76396699478847,0 -27.23304382658236,38.76376882993236,0 -27.23318072241769,38.76366692918068,0 -27.23331704325356,38.76356234716673,0 -27.23345280344845,38.76345507287877,0 -27.23358801872725,38.76334509389469,0 -27.23372270346451,38.76323239859566,0 -27.23385687758442,38.7631169703833,0 -27.23399055977527,38.76299879318577,0 -27.23412377070348,38.76287784873861,0 -27.2342565055293,38.76275414239718,0 -27.23438881479689,38.76262762801903,0 -27.23452072357682,38.76249828164017,0 -27.23465225994481,38.76236607573784,0 -27.23478344891816,38.76223098534284,0 -27.23491432821287,38.76209297179221,0 -27.23504493284978,38.76195199817011,0 -27.23517530270375,38.76180802144818,0 -27.23530481251124,38.76166175723228,0 -27.23543417947523,38.76151242061089,0 -27.23556345438584,38.7613599529778,0 -27.23569269635945,38.76120428463159,0 -27.23582195533032,38.76104535596074,0 -27.23595131925575,38.7608830593464,0 -27.2360808685949,38.76071729389391,0 -27.23621070013742,38.76054793579499,0 -27.23634064279734,38.76037521853165,0 -27.23647109998894,38.76019861615279,0 -27.23660221327246,38.76001793713343,0 -27.23673416205599,38.75983293432743,0 -27.23700128029947,38.75944895925754,0 -27.23727491329717,38.75904316053902,0 -27.23742273738627,38.75882321739541,0 -27.23780628320971,38.7582596334405,0 -27.23800989160193,38.75795256428651,0 -27.23811868856789,38.75778263920782,0 -27.23821718378055,38.75762354998231,0 -27.23830718694751,38.75747237002381,0 -27.23838956507541,38.75732763526367,0 -27.23847282603321,38.7571732116243,0 -27.238548035592,38.75702432042956,0 -27.23861558928537,38.75688017719555,0 -27.23867573238223,38.75674025619546,0 -27.23872870543045,38.75660397754798,0 -27.23877457120775,38.75647115633146,0 -27.23881342738702,38.75634150895377,0 -27.23884533845979,38.75621481909636,0 -27.23886673551093,38.7561129610315,0 -27.23888508811263,38.75600920686833,0 -27.23890038706612,38.75590360856031,0 -27.23891262432747,38.75579622156989,0 -27.23892179355083,38.75568710026053,0 -27.23892788918181,38.75557630896845,0 -27.23893090772273,38.7554639111042,0 -27.23893084735882,38.75534997392131,0 -27.23892770685109,38.75523453543156,0 -27.23892148778874,38.75511769974425,0 -27.23891219419143,38.75499954253525,0 -27.23889983231599,38.75488014346003,0 -27.2388844101235,38.75475958075705,0 -27.23886593890103,38.754637943742,0 -27.23884443198736,38.75451532030465,0 -27.23881990545645,38.75439180213629,0 -27.23879232165071,38.75426724125324,0 -27.23876174682703,38.75414197399635,0 -27.23872820528872,38.7540160999645,0 -27.23869172443649,38.75388972201208,0 -27.23865233349027,38.75376294170691,0 -27.23861006653693,38.75363586907734,0 -27.23856495964501,38.75350861257505,0 -27.23851705205235,38.75338128291314,0 -27.23846637882651,38.75325397477348,0 -27.23841299122693,38.75312681833655,0 -27.2383569370044,38.75299992733896,0 -27.23829826680813,38.75287341644324,0 -27.23823703347693,38.75274739963977,0 -27.23817329315948,38.75262199253421,0 -27.23810710404345,38.75249730960873,0 -27.2380385265934,38.75237346476363,0 -27.2379677733863,38.75225082581998,0 -27.23789476817801,38.75212924508547,0 -27.23781957688305,38.75200883232762,0 -27.23774226679539,38.75188969530879,0 -27.23766290786357,38.75177194172326,0 -27.23758156879769,38.75165567342888,0 -27.23749832060247,38.75154099191421,0 -27.23741323466197,38.75142799551031,0 -27.2373263999285,38.75131680116741,0 -27.23723787263397,38.75120747973607,0 -27.23714772560759,38.75110012114307,0 -27.23705603109822,38.75099481142296,0 -27.23696286421176,38.75089163667157,0 -27.23686829413605,38.75079067334946,0 -27.23677239257408,38.75069199799707,0 -27.23667522985909,38.75059568297223,0 -27.23657708382262,38.7505019923148,0 -27.23647781991508,38.75041078636087,0 -27.23637750589586,38.75032212735943,0 -27.23627620761544,38.75023607350045,0 -27.23617399350763,38.7501526827544,0 -27.23607092380123,38.75007200409552,0 -27.23596706112254,38.74999408653569,0 -27.23586246587844,38.74991897538261,0 -27.23575722532213,38.74984673197962,0 -27.23565136956796,38.74977737569304,0 -27.23554495515263,38.74971094355692,0 -27.23543803629333,38.74964746940916,0 -27.23533066926158,38.74958698651615,0 -27.23522290222911,38.7495295218748,0 -27.23511478537194,38.74947510223277,0 -27.23500636659661,38.74942375169552,0 -27.23482738519503,38.7493452016533,0 -27.23463835778881,38.749269191685,0 -27.23443971956587,38.74919589703249,0 -27.23423199473206,38.74912551133598,0 -27.23401566371457,38.74905820174127,0 -27.23379151064361,38.74899421639199,0 -27.23356029306371,38.74893377180796,0 -27.23332289676129,38.74887709980457,0 -27.23307907505249,38.74882418051674,0 -27.23283109306343,38.74877554380838,0 -27.23258013481521,38.74873142215741,0 -27.23232751833309,38.74869204755323,0 -27.23207450470656,38.74865762017583,0 -27.23182269009607,38.74862836085709,0 -27.23157358619124,38.7486044453623,0 -27.23132875289392,38.74858602361687,0 -27.23120591857409,38.74857976175401,0 -27.2310822445079,38.74857678640888,0 -27.23095767413366,38.74857709620133,0 -27.23083214402786,38.74858069127193,0 -27.2307055968252,38.74858757286774,0 -27.23057794712739,38.74859774524296,0 -27.23044911431819,38.74861121479052,0 -27.23031900599911,38.74862799114364,0 -27.23018768802787,38.74864805990229,0 -27.2300548848507,38.74867145733981,0 -27.22992047335534,38.74869820509065,0 -27.22978430792062,38.74872833208681,0 -27.22964626657597,38.74876186406844,0 -27.22950612303614,38.74879885478752,0 -27.22936366739608,38.74883935953316,0 -27.22921863865422,38.7488834524255,0 -27.22909177277861,38.74892426360832,0 -27.22896255790496,38.74896786353667,0 -27.2288307332273,38.74901434008235,0 -27.22869596140787,38.74906381207958,0 -27.22841622912033,38.74917223246897,0 -27.22811837825947,38.74929505170687,0 -27.2278448731741,38.74941328219447,0 -27.227541449293,38.74954909306857,0 -27.2272398934558,38.74968737229344,0 -27.22644674868822,38.75005512757424,0 -27.22600002777919,38.75025672146022,0 -27.22576064731084,38.75036084271311,0 -27.22553620548234,38.75045513442279,0 -27.22532247289966,38.75054137122844,0 -27.2251172874045,38.75062042097871,0 -27.22487437024204,38.75070867101595,0 -27.22463977848014,38.75078778540777,0 -27.22441194847619,38.75085829034273,0 -27.22418984551383,38.75092050425656,0 -27.22397231877521,38.75097473629478,0 -27.22375900998271,38.75102106202682,0 -27.2235493578549,38.75105960297524,0 -27.22334293194738,38.75109043777277,0 -27.22248825626953,38.75120088757184,0 -27.22182230973787,38.75128060723301,0 -27.22151064607023,38.75131489332204,0 -27.22121320900901,38.75134537881331,0 -27.22092730509341,38.75137233908623,0 -27.22065142630675,38.7513959151054,0 -27.22037670252145,38.75141675305714,0 -27.22011045085163,38.75143418108604,0 -27.21985196060567,38.75144824551808,0 -27.21960073909353,38.75145897288128,0 -27.21935624441484,38.75146638394399,0 -27.21911829336113,38.75147048178311,0 -27.21888661569695,38.75147127097782,0 -27.21866100573137,38.7514687521313,0 -27.21843530069745,38.75146271535803,0 -27.21821565666309,38.75145317906544,0 -27.21800193659905,38.75144013726263,0 -27.21779403155182,38.75142358324926,0 -27.21759182545947,38.75140350720535,0 -27.21739525860525,38.75137990260063,0 -27.2172042596283,38.75135276084227,0 -27.21701877000656,38.75132207358575,0 -27.21683865606584,38.75128781565682,0 -27.21666395938265,38.75124999180787,0 -27.21649463993127,38.75120859335799,0 -27.21633066424869,38.75116361210792,0 -27.21617199748879,38.75111503827527,0 -27.21601861863037,38.75106286519198,0 -27.21587050424763,38.75100708487924,0 -27.21572763451912,38.75094768986033,0 -27.21558852382947,38.75088410039073,0 -27.21544995136742,38.75081498897627,0 -27.21531191590046,38.75074035500551,0 -27.21517441553065,38.75066019745504,0 -27.21503744907211,38.75057451570409,0 -27.21490101237817,38.75048330722881,0 -27.21476510191475,38.75038656967269,0 -27.21462971295492,38.75028429967642,0 -27.21449485822063,38.7501765080487,0 -27.21436051261766,38.75006317593334,0 -27.21422666842466,38.7499442968286,0 -27.21409331567126,38.7498198618888,0 -27.21396044701728,38.74968986453582,0 -27.21382804444829,38.74955428741374,0 -27.21369609213701,38.74941311434077,0 -27.21356456966582,38.74926632349327,0 -27.21343445284213,38.74911507357999,0 -27.21330470806563,38.74895823277817,0 -27.21317530308155,38.74879576215428,0 -27.21304619541673,38.74862760842805,0 -27.21291735694487,38.74845373645275,0 -27.21278870363107,38.7482740342878,0 -27.21266016235899,38.74808839996945,0 -27.21253163164696,38.74789668706511,0 -27.21240374852115,38.74769989951427,0 -27.21227559282468,38.747496674906,0 -27.2121469675219,38.74728670143765,0 -27.2120175662752,38.74706947946041,0 -27.2118873881492,38.74684503431703,0 -27.21175542219669,38.74661164897644,0 -27.21162084817237,38.74636787880318,0 -27.21148185808549,38.74611045148745,0 -27.21141059465121,38.74597020673011,0 -27.21134504488995,38.74582690715547,0 -27.21128517716249,38.7456804836995,0 -27.21123095907964,38.74553085724511,0 -27.21118236374742,38.74537795618498,0 -27.21113935488185,38.74522166924648,0 -27.21110190315685,38.74506189013432,0 -27.21106997931118,38.74489849428048,0 -27.21104359202973,38.7447315978056,0 -27.21102266429577,38.74456080003387,0 -27.21100717447168,38.74438592544488,0 -27.21099710359722,38.74420676119134,0 -27.21099243890608,38.74402313270878,0 -27.2109931686662,38.743834690244,0 -27.21099929386437,38.74364110707045,0 -27.21101082756203,38.74344196364234,0 -27.21102391347287,38.74327891664058,0 -27.21104047861767,38.74311171495466,0 -27.21106055793999,38.74294000363622,0 -27.21108420592674,38.74276331531568,0 -27.21111145622407,38.74258135334508,0 -27.21114244899664,38.74239314326506,0 -27.21117732928881,38.74219779957536,0 -27.2112163382139,38.74199396919797,0 -27.21128867956281,38.74164347575913,0 -27.21137568999005,38.74125151330366,0 -27.2114635849919,38.74087392396623,0 -27.21168195619748,38.73995545782888,0 -27.21179033089587,38.73948075677161,0 -27.2118420390903,38.73924172785145,0 -27.21188808609688,38.73901798162181,0 -27.21192925225611,38.7388057196365,0 -27.21196592341023,38.7386029382088,0 -27.21200164588548,38.73838744383408,0 -27.21203243339186,38.73818024157195,0 -27.21205845202395,38.73798021019175,0 -27.21207980101776,38.73778658094679,0 -27.21209656679224,38.73759851444669,0 -27.21210876911162,38.73741571694283,0 -27.21211643626571,38.73723776181281,0 -27.21211958223756,38.73706431875612,0 -27.21211819663746,38.7368943757885,0 -27.21211225412262,38.73672844720058,0 -27.21210174685798,38.73656631685282,0 -27.21208666321307,38.73640780707727,0 -27.21206698396473,38.73625272973531,0 -27.21204269392168,38.73610097585296,0 -27.21201377298565,38.73595242020424,0 -27.21198020031219,38.73580695605022,0 -27.21194191776625,38.73566436200746,0 -27.21189892947589,38.73552468025856,0 -27.21185121089692,38.73538783116581,0 -27.2117987377511,38.73525374521916,0 -27.21174148121768,38.73512235010865,0 -27.21167941915212,38.73499359624903,0 -27.21161252565477,38.73486742995908,0 -27.21154077543868,38.7347438035976,0 -27.21145173596002,38.73459988091043,0 -27.21135867846361,38.73445525287706,0 -27.21126166005012,38.73431000825926,0 -27.21116074303775,38.73416424036888,0 -27.2110559899577,38.7340180397985,0 -27.21094747573999,38.73387151138639,0 -27.21083527595643,38.73372475719305,0 -27.21071947200588,38.73357788370028,0 -27.21060011397761,38.73343095640012,0 -27.21047732670859,38.73328413087087,0 -27.21035120584296,38.73313752149332,0 -27.21022185308595,38.73299124650701,0 -27.21008937029383,38.73284542128005,0 -27.20995387299881,38.73270017316265,0 -27.20981547695688,38.73255562625027,0 -27.20967430364322,38.73241190742657,0 -27.20953023990269,38.73226891051566,0 -27.20938364660402,38.73212700257259,0 -27.20923465842538,38.73198631397708,0 -27.20908341476548,38.73184697636911,0 -27.20893005585507,38.73170911901951,0 -27.20877473031527,38.73157287560562,0 -27.2086175871639,38.73143837684063,0 -27.20845877845312,38.7313057528692,0 -27.20829845274421,38.7311751279254,0 -27.20813677151086,38.73104663373673,0 -27.207973892217,38.73092039544478,0 -27.20780997322862,38.73079653578976,0 -27.20764517486511,38.73067517587352,0 -27.2074796547815,38.73055643175866,0 -27.20731357190957,38.73044041745871,0 -27.20714708386228,38.7303272430681,0 -27.20690014470547,38.73016472892547,0 -27.20664699053392,38.73000415070761,0 -27.20638810862824,38.72984581747186,0 -27.2061239862139,38.72969002718351,0 -27.20585513258129,38.72953707964497,0 -27.20558201471679,38.72938723993569,0 -27.2053051170335,38.729240773775,0 -27.20502491116473,38.72909793059614,0 -27.20474209173433,38.7289590581201,0 -27.20445688651241,38.72882426187192,0 -27.20416973898013,38.72869375140693,0 -27.20388107180008,38.72856771878246,0 -27.20359132737725,38.72844635636452,0 -27.20330086946601,38.7283298157294,0 -27.20301008002643,38.72821825008604,0 -27.2027193172941,38.72811179683103,0 -27.20243082235652,38.72801122659314,0 -27.20214301537401,38.72791593880631,0 -27.20185620432876,38.72782603539874,0 -27.20157067498805,38.72774160590588,0 -27.20128672527999,38.72766273778894,0 -27.20100458758929,38.72758949495415,0 -27.20072450714158,38.72752194102819,0 -27.20044670981676,38.72746013045638,0 -27.20017157376065,38.7274041427263,0 -27.19989913376105,38.72735398022326,0 -27.19962958052726,38.72730967803279,0 -27.19936308895034,38.72727126486866,0 -27.19909984014121,38.72723876638173,0 -27.19883997326724,38.72721219929024,0 -27.19858363478296,38.72719157854294,0 -27.19833095866383,38.72717691489173,0 -27.19813918084938,38.72716892681159,0 -27.19794340394995,38.72716265236,0 -27.19754196261374,38.72715530712731,0 -27.19713073346034,38.72715495301362,0 -27.19671328464796,38.72716159193035,0 -27.19629363249118,38.72717514274733,0 -27.19587390489978,38.72719551953242,0 -27.19545666016643,38.72722259733049,0 -27.19504398109473,38.72725624010979,0 -27.19464136004061,38.72729590676212,0 -27.19424656150965,38.72734172288162,0 -27.19386092203355,38.72739353294735,0 -27.19367187787398,38.72742164045378,0 -27.19348551637842,38.72745119206687,0 -27.19330205558325,38.72748215160549,0 -27.19312149105275,38.72751451818657,0 -27.1929439197475,38.72754827442053,0 -27.19276942876467,38.72758340374001,0 -27.19259810823115,38.72761988785558,0 -27.19243002416454,38.72765771256031,0 -27.19226524657739,38.72769686209167,0 -27.1921038384775,38.72773732147162,0 -27.191949747561,38.72777802141756,0 -27.19179896694338,38.72781993950451,0 -27.1916515437142,38.72786306263596,0 -27.1915075204337,38.72790737835684,0 -27.19136694059185,38.72795287320177,0 -27.19122983715231,38.72799953641698,0 -27.19109624447918,38.72804735630225,0 -27.19096619367483,38.72809632171961,0 -27.19083973433525,38.72814641338783,0 -27.19071687161172,38.72819762864133,0 -27.19059763054261,38.72824995703918,0 -27.19048203379719,38.72830338862894,0 -27.19037010423581,38.72835791278299,0 -27.19026185956161,38.7284135208143,0 -27.19015731793781,38.72847020338875,0 -27.19005649579727,38.72852795159272,0 -27.18995948630009,38.72858670815042,0 -27.18986621950967,38.72864651135507,0 -27.18977670844085,38.72870735285847,0 -27.18969096483919,38.72876922467378,0 -27.18960900034826,38.72883211834864,0 -27.18953082410074,38.72889602682218,0 -27.18945644528015,38.72896094258402,0 -27.18938587213311,38.7290268584337,0 -27.18931911627612,38.72909376309922,0 -27.18925618008816,38.72916165374993,0 -27.18919706985481,38.72923052360254,0 -27.18914179116532,38.72930036614195,0 -27.18909034939896,38.72937117452083,0 -27.18904274874949,38.72944294291212,0 -27.18899899329526,38.72951566516369,0 -27.18895908659586,38.72958933535601,0 -27.18892394865795,38.72966120169667,0 -27.18889076567728,38.72973580899575,0 -27.18885954005629,38.72981315185506,0 -27.18883027419361,38.72989322433704,0 -27.18880297024553,38.72997602061616,0 -27.18877763067499,38.73006153330285,0 -27.18875425766473,38.73014975503702,0 -27.18873285336149,38.73024067772171,0 -27.1887134185306,38.73033429924491,0 -27.18869595666115,38.7304306040526,0 -27.18868046957007,38.73052958213547,0 -27.18866695898544,38.73063122246138,0 -27.1886554263569,38.73073551440336,0 -27.18864587325651,38.7308424440708,0 -27.18863830090584,38.73095199781816,0 -27.18863271034983,38.73106416056024,0 -27.18862909971804,38.7311790347537,0 -27.18862747628773,38.73129648953492,0 -27.18862784032145,38.73141650613084,0 -27.18863019175883,38.73153906371539,0 -27.18863453027711,38.7316641425385,0 -27.18864085500567,38.73179171592132,0 -27.18864916466439,38.73192175796773,0 -27.18865945741983,38.73205423993191,0 -27.1886859878299,38.73232645095708,0 -27.18872041646798,38.73260802458471,0 -27.18876270517184,38.73289864865496,0 -27.18881280412953,38.73319798015404,0 -27.18883663476489,38.73331673573109,0 -27.18886615674557,38.73343698796821,0 -27.18890141524026,38.73355892178645,0 -27.18894247706895,38.73368276889245,0 -27.18898939259021,38.73380869873033,0 -27.18904231397935,38.73393713489184,0 -27.18910139913369,38.73406846216435,0 -27.18916688720827,38.73420321313715,0 -27.18924167396147,38.73434684273483,0 -27.1893241826989,38.73449586063497,0 -27.18941513363892,38.734651575448,0 -27.18951593240068,38.73481639754381,0 -27.1896181826143,38.73497751033025,0 -27.18973439982373,38.73515541841834,0 -27.19018605203509,38.73582791775342,0 -27.1903712898849,38.73611033430395,0 -27.19046838178194,38.73626385019644,0 -27.19055606913146,38.73640742358242,0 -27.19063608714385,38.7365438991279,0 -27.19070927753537,38.73667472014628,0 -27.19079273722828,38.73683322728972,0 -27.19086711827129,38.73698599511878,0 -27.19093295891374,38.73713413166348,0 -27.19099058064693,38.7372783646363,0 -27.19104029225697,38.73741950284089,0 -27.19108216627952,38.73755779463002,0 -27.19111632108827,38.73769363227181,0 -27.19114283171037,38.73782731629139,0 -27.19116061989848,38.73794385390466,0 -27.19117430862123,38.73806163539113,0 -27.19118390449178,38.73818071742046,0 -27.19118941268732,38.73830116394699,0 -27.19119083639863,38.7384230327591,0 -27.19118817718344,38.73854641117973,0 -27.19118143330354,38.73867138187394,0 -27.19117059964551,38.73879804028981,0 -27.19115569094176,38.7389263103497,0 -27.19113668119285,38.73905648542554,0 -27.19111355155627,38.73918869507843,0 -27.19108627503796,38.73932309397416,0 -27.19105482735162,38.73945981039903,0 -27.19101915367581,38.7395990900758,0 -27.19097919570933,38.73974116126748,0 -27.19093487268818,38.7398863115861,0 -27.19089497427517,38.74000853694508,0 -27.1908519651505,38.74013330954461,0 -27.19080575588196,38.74026088927787,0 -27.1907562240693,38.74039161439994,0 -27.19070329002338,38.74052570615633,0 -27.19064668673071,38.74066385097714,0 -27.1905213136094,38.74095510053989,0 -27.19040274858234,38.74121704718901,0 -27.19026592512995,38.74150858642706,0 -27.19012817961556,38.74179490290776,0 -27.18977009833052,38.74253085507775,0 -27.18957773940118,38.74293647353307,0 -27.18947957639873,38.74315072864952,0 -27.18939053561994,38.74335143861227,0 -27.18930898434867,38.74354228800275,0 -27.18923411668244,38.74372517180082,0 -27.18915198012717,38.74393691316043,0 -27.18907800656231,38.74414093130898,0 -27.18901172574959,38.74433852567006,0 -27.18895284909972,38.74453056077424,0 -27.18890109422789,38.74471799255377,0 -27.18885638851607,38.74490112444654,0 -27.18881861793599,38.74508042482425,0 -27.18878770726447,38.74525625272694,0 -27.18870085203184,38.74582584434626,0 -27.18862717654659,38.74635165347131,0 -27.18859458651107,38.74660307629632,0 -27.18856469861592,38.7468478729715,0 -27.18853741501688,38.74708684606931,0 -27.18851266949108,38.74732057739243,0 -27.18849028113602,38.74755094673342,0 -27.18847036882661,38.74777692181144,0 -27.18845290155111,38.7479988552428,0 -27.18843785739455,38.74821702643958,0 -27.18842521633048,38.74843173736259,0 -27.18841497006124,38.74864314283723,0 -27.18840710949942,38.7488514309799,0 -27.18840162876867,38.74905675846252,0 -27.18839850201266,38.74926159661477,0 -27.18839780465077,38.74946367948883,0 -27.18839953629648,38.74966312437654,0 -27.18840369784487,38.74986003191504,0 -27.18841029181308,38.75005450880563,0 -27.18841932078527,38.75024662338093,0 -27.18843078836296,38.7504364520293,0 -27.18844469860636,38.75062406174459,0 -27.18846106281711,38.75080958497271,0 -27.188479881155,38.75099300651938,0 -27.18850115903716,38.75117437911008,0 -27.18852490198379,38.75135374972517,0 -27.18855111662287,38.75153116756555,0 -27.18857980826068,38.75170666774878,0 -27.18861098310068,38.75188028818663,0 -27.18864464728837,38.75205206307154,0 -27.18868749449456,38.75225273316438,0 -27.18873460816422,38.75245623463601,0 -27.188786021194,38.75266270981781,0 -27.18884177625773,38.75287233027186,0 -27.18890190939916,38.75308523621185,0 -27.18896649788366,38.75330170551038,0 -27.1890356181375,38.75352199470389,0 -27.18910937205718,38.7537464288336,0 -27.18918740695496,38.75397402228825,0 -27.18927030173587,38.75420654553288,0 -27.18935824864975,38.75444453871747,0 -27.18945152399466,38.7546887501386,0 -27.18955025276465,38.75493953259902,0 -27.18965513799146,38.75519869545522,0 -27.18976682616188,38.75546783983983,0 -27.18988646170342,38.75574972561854,0 -27.19006196533133,38.75615433613679,0 -27.1902342772615,38.75654215245411,0 -27.19040464407378,38.75691597808156,0 -27.19057383221661,38.75727749128646,0 -27.19074273442756,38.75762857712812,0 -27.1909115510243,38.75796962895826,0 -27.19108067327553,38.75830143669791,0 -27.19125039112538,38.75862456847015,0 -27.19142170519865,38.7589408652083,0 -27.1915940857455,38.75924928478488,0 -27.19176771842914,38.75955015918229,0 -27.19194275251691,38.75984374680303,0 -27.19211935526961,38.76013032564426,0 -27.19229761111885,38.76041003015693,0 -27.19247762583159,38.76068302621089,0 -27.19265948848381,38.76094944878414,0 -27.19284481514369,38.76121154952377,0 -27.19303217885427,38.76146719539506,0 -27.19322164884049,38.76171648080256,0 -27.19341328508578,38.76195948461088,0 -27.19360715349517,38.76219628973243,0 -27.1938032952134,38.76242694576845,0 -27.19400175782497,38.76265150864967,0 -27.19420258341799,38.76287002596902,0 -27.19440586441834,38.76308259497701,0 -27.19461158585384,38.76328919673625,0 -27.1948197822372,38.76348986589101,0 -27.19503048454968,38.76368463228459,0 -27.19524372638268,38.76387352673886,0 -27.19545953100176,38.7640565696354,0 -27.19567792440407,38.76423378301452,0 -27.19589893018957,38.76440518601513,0 -27.19605818843878,38.76452437372957,0 -27.19622057939896,38.76464292088152,0 -27.19638603886936,38.76476078059946,0 -27.19655449915801,38.76487790466091,0 -27.19672589307295,38.76499424627901,0 -27.19690014448065,38.76510975370486,0 -27.1970771776278,38.76522437671935,0 -27.19725691312501,38.76533806391649,0 -27.19743929464389,38.76545077911634,0 -27.19762421225966,38.76556245384028,0 -27.19781157840399,38.76567303520082,0 -27.19800130190742,38.7657824693872,0 -27.19819329215797,38.76589070407695,0 -27.19838744961248,38.76599768309626,0 -27.19858367530335,38.76610335191186,0 -27.19878186691985,38.76620765542572,0 -27.19898209611115,38.76631062818984,0 -27.19918408249927,38.76641212288615,0 -27.19938771655593,38.76651208447624,0 -27.19959288590637,38.76661045779412,0 -27.19979947849297,38.76670718907619,0 -27.20000737586701,38.76680222282719,0 -27.2002164600979,38.7668955051373,0 -27.20042661115767,38.76698698245464,0 -27.20063771909825,38.76707660673771,0 -27.20084964994435,38.76716432092697,0 -27.20106227997511,38.76725007381594,0 -27.20127548432301,38.76733381504508,0 -27.20148913795789,38.76741549549897,0 -27.20170311439982,38.76749506681693,0 -27.20191728731548,38.76757248201959,0 -27.20213153028475,38.76764769541091,0 -27.20230884957426,38.76770800063872,0 -27.2024886345769,38.76776712256585,0 -27.20267091091917,38.76782506962249,0 -27.20285570696472,38.76788185082823,0 -27.20304304920958,38.76793747438003,0 -27.20323297416877,38.7679919511741,0 -27.20362071661821,38.76809750553573,0 -27.20401915948825,38.76819857778252,0 -27.20442878101063,38.76829529169798,0 -27.20485002660274,38.76838775268818,0 -27.20528347559215,38.76847608809693,0 -27.20572704903085,38.7685599345337,0 -27.20618421106386,38.76864000516378,0 -27.20665598325602,38.76871647956608,0 -27.20714382411595,38.76878959462068,0 -27.20764830927447,38.76885945750766,0 -27.20817321933912,38.76892661150327,0 -27.20872189938012,38.76899148793748,0 -27.20930042336712,38.76905480681801,0 -27.20988241950854,38.7691151597466,0 -27.2103643495705,38.76916272496823,0 -27.21080418723822,38.76920321718713,0 -27.21121265009832,38.76923757069877,0 -27.21160635774646,38.76926707577056,0 -27.21198148844641,38.76929132824638,0 -27.21234154863257,38.76931055367068,0 -27.21268862074321,38.76932486124491,0 -27.21303309958522,38.76933450448849,0 -27.21336694331761,38.76933907550208,0 -27.21369120346714,38.7693385883228,0 -27.2140066383594,38.76933304130473,0 -27.21431407415193,38.76932241540291,0 -27.21461383726097,38.76930669462993,0 -27.21490637211872,38.76928585552832,0 -27.21519202864156,38.76925987297977,0</coordinates></LinearRing></outerBoundaryIs>
        </Polygon>
        <Polygon>
          <extrude>0</extrude>          <altitudeMode>clampToGround</altitudeMode>
          <outerBoundaryIs><LinearRing><coordinates> -27.28116519384512,38.72806824691281,0 -27.28090271513857,38.72815378956475,0 -27.28062189092725,38.72824097360268,0 -27.28031988355294,38.72833068443761,0 -27.27999123276976,38.72842454620763,0 -27.27968160157003,38.72851022336751,0 -27.27933328762911,38.72860428852778,0 -27.27801453051752,38.7289522144394,0 -27.27746201770378,38.72910071713165,0 -27.27716795560653,38.72918192620141,0 -27.27689461427844,38.72925928417817,0 -27.27663696031942,38.72933421678455,0 -27.2763924742215,38.72940745933332,0 -27.27610867356155,38.72949554417914,0 -27.27583939855387,38.7295826727589,0 -27.27558295241213,38.7296693947426,0 -27.27533824234604,38.72975608070357,0 -27.27510408511144,38.72984315757542,0 -27.27488014013792,38.72993076029812,0 -27.27466586072613,38.73001910295906,0 -27.27446084150308,38.73010835299849,0 -27.27422543411615,38.73021740095792,0 -27.27400251403923,38.73032820823466,0 -27.27389560758484,38.73038433541477,0 -27.27379168522103,38.73044097196257,0 -27.27369070966877,38.73049813820239,0 -27.27359264827339,38.73055585263008,0 -27.27349744224462,38.73061415088235,0 -27.27340509494422,38.73067303196817,0 -27.27331558140797,38.73073251181068,0 -27.27322887954917,38.73079260509255,0 -27.27314496690982,38.73085332747122,0 -27.27306382718271,38.73091469084238,0 -27.27298544330109,38.73097670811768,0 -27.27290980007005,38.73103939132461,0 -27.27283679337661,38.7311028322824,0 -27.27276650732625,38.73116696365985,0 -27.27269893009042,38.73123179625376,0 -27.27263405110639,38.73129734020214,0 -27.27257185981969,38.73136360623245,0 -27.27251234823143,38.73143060293534,0 -27.27245550817981,38.73149833950268,0 -27.27240133237935,38.73156682462048,0 -27.27234980999762,38.73163607248785,0 -27.27230093953019,38.73170608565849,0 -27.27225471542067,38.73177687209589,0 -27.27221113273109,38.73184843936566,0 -27.27217018665092,38.73192079542351,0 -27.27213187347689,38.73199394687377,0 -27.2720961895464,38.73206790071265,0 -27.27206313163921,38.73214266361781,0 -27.27201020629539,38.73227530646087,0 -27.27196088749992,38.73241406105132,0 -27.27191525637589,38.73255869961628,0 -27.27187339940319,38.73270894848277,0 -27.27183538801796,38.73286456221513,0 -27.27180132646161,38.73302512609434,0 -27.27177129917294,38.73319024309503,0 -27.27174539207848,38.73335944175961,0 -27.2717235899105,38.7335330472244,0 -27.27170610439603,38.73370964297914,0 -27.27169300123385,38.73388856822496,0 -27.27168433667037,38.73406905835982,0 -27.27168014883193,38.73425041660889,0 -27.27168046638976,38.73443160292072,0 -27.27168528790945,38.7346116500962,0 -27.27169458526395,38.73478949749222,0 -27.27170756485427,38.7349416133971,0 -27.2717267272887,38.73509513792625,0 -27.27175207453423,38.73525008691822,0 -27.27178360956784,38.73540647862525,0 -27.27182133543753,38.73556432916564,0 -27.2718652581517,38.73572366451117,0 -27.27191538438624,38.73588450893692,0 -27.27197172296685,38.73604689080688,0 -27.27203426205776,38.73621078444199,0 -27.27210303351869,38.73637628092362,0 -27.27217805346452,38.73654341909672,0 -27.27225934264213,38.73671224523487,0 -27.27234691912352,38.73688279808768,0 -27.27244081925031,38.73705514954791,0 -27.27254107905797,38.73722936585115,0 -27.27264774521642,38.73740552816638,0 -27.27275893131091,38.73758073600639,0 -27.27287643126846,38.73775801790518,0 -27.27300032289119,38.73793749140163,0 -27.27313070957498,38.73811930639423,0 -27.27326766583726,38.73830357031472,0 -27.27341139763662,38.73849056356875,0 -27.27356209852328,38.73868053831803,0 -27.27372004333368,38.73887384127536,0 -27.27388325496538,38.73906816597563,0 -27.27405431035398,38.73926668803087,0 -27.27423379208564,38.73947008481289,0 -27.27442266045334,38.73967944531818,0 -27.27462049010349,38.73989435484381,0 -27.27483110759109,38.74011902250548,0 -27.2750575916602,38.74035674866937,0 -27.27530939650988,38.74061746172894,0 -27.27546508740529,38.74077267778327,0 -27.27562767270484,38.74092490125978,0 -27.27579722959648,38.74107420448574,0 -27.27597384786064,38.74122066656717,0 -27.2761576105236,38.74136435747563,0 -27.27634864648938,38.7415053790757,0 -27.27654708169541,38.74164382441772,0 -27.27675306508992,38.74177979749104,0 -27.27696646898347,38.74191322908441,0 -27.27718775951122,38.74204442516467,0 -27.27741715251754,38.74217351383478,0 -27.277654910539,38.7423006429448,0 -27.27790125446809,38.74242593353391,0 -27.2781566133492,38.74254960660778,0 -27.27842139477513,38.74267185983073,0 -27.27869611925967,38.74279293373353,0 -27.2789334558121,38.74289327303409,0 -27.27917858217259,38.74299316379832,0 -27.2794320040224,38.74309281233925,0 -27.27969438597,38.74319248017136,0 -27.27996616496127,38.74329233971703,0 -27.28024870681851,38.74339289892614,0 -27.28054326603807,38.74349460507322,0 -27.28085173353752,38.7435981115668,0 -27.28140566016725,38.74377756914409,0 -27.28202813879886,38.74397172129272,0 -27.28264670205511,38.74415945131882,0 -27.28425658587848,38.74464182317008,0 -27.28472507823468,38.74478499479193,0 -27.28514443882764,38.74491583935202,0 -27.28561109941171,38.74506546555762,0 -27.28604413778244,38.7452091199632,0 -27.28645157869626,38.74534946781867,0 -27.28683748875521,38.74548791645994,0 -27.28706267705318,38.74557154497832,0 -27.28728157764241,38.74565507082109,0 -27.28749462317742,38.7457386591593,0 -27.28770215318648,38.74582244331429,0 -27.28790453020389,38.74590657076843,0 -27.28810193909033,38.74599111952956,0 -27.28829460298315,38.74607618520845,0 -27.28848270654063,38.74616184938837,0 -27.2886666651803,38.74624830674121,0 -27.28884636313821,38.74633550848596,0 -27.28902193183435,38.74642351842215,0 -27.28919348357275,38.74651239287641,0 -27.2893611356381,38.74660219298597,0 -27.28952496394364,38.74669295980068,0 -27.28968505205805,38.74678473963747,0 -27.28984147294,38.74687757434367,0 -27.29009451409156,38.74703321482983,0 -27.29034943493573,38.74719567829591,0 -27.29060678880859,38.74736531696921,0 -27.29086729267586,38.74754260313116,0 -27.29113139988346,38.74772783343689,0 -27.29140057259411,38.74792202188639,0 -27.29167611253287,38.74812610600763,0 -27.2919599883544,38.74834154291633,0 -27.29219344666951,38.74852230555277,0 -27.29243579191058,38.74871302323967,0 -27.29268956616516,38.74891569272328,0 -27.29295976112371,38.74913429864836,0 -27.29345489612333,38.74954053789398,0 -27.29462573337984,38.75051018502258,0 -27.29493505779418,38.75076357996107,0 -27.29521585055156,38.75099106134391,0 -27.29550450672815,38.75122168436028,0 -27.29577824469047,38.7514367666683,0 -27.29604134229434,38.75163966757035,0 -27.29629613585581,38.7518321851635,0 -27.29653974270189,38.75201225985303,0 -27.29677836566396,38.75218459704379,0 -27.29701300886446,38.75234992151987,0 -27.29724440025667,38.75250874560443,0 -27.29747334750098,38.75266161873773,0 -27.29770017512956,38.75280875255677,0 -27.29792532863927,38.7529504358819,0 -27.29814916575716,38.75308689362525,0 -27.29831087358907,38.75318187296695,0 -27.29847842408146,38.75327637066508,0 -27.29865215483516,38.75337057737678,0 -27.29883251202363,38.75346473523004,0 -27.29901978659268,38.75355900274518,0 -27.29921490491214,38.75365385248927,0 -27.29941871961986,38.75374969975097,0 -27.29963252275776,38.7538471526541,0 -27.30001694450903,38.75401578806056,0 -27.30044967691633,38.75419791434085,0 -27.30087879608078,38.75437322086295,0 -27.30198009767091,38.75481687654244,0 -27.30229617153279,38.75494691089457,0 -27.30257831696578,38.75506559023482,0 -27.30289081970508,38.75520093946967,0 -27.3031795995783,38.75533068906322,0 -27.30345006077764,38.75545727022785,0 -27.30370494175939,38.75558197105597,0 -27.3038534709528,38.75565745080968,0 -27.30399733607395,38.7557327843293,0 -27.30413682883699,38.75580812445281,0 -27.30427217764855,38.75588359465279,0 -27.30440362506284,38.75595933132803,0 -27.30453129484451,38.75603540698782,0 -27.30465533569069,38.75611191028199,0 -27.30477587028848,38.75618891693333,0 -27.3048931706713,38.75626660648891,0 -27.30500716124603,38.75634493480933,0 -27.30511792829404,38.75642396120981,0 -27.30522554525682,38.75650373811914,0 -27.30533008826944,38.75658432238095,0 -27.30543160654277,38.75666575234757,0 -27.30553015390375,38.75674807121305,0 -27.30562577710413,38.75683131805157,0 -27.30601846121593,38.75717992926963,0 -27.30624775873164,38.75738602112777,0 -27.30646141334809,38.75758229489914,0 -27.30665175056856,38.75776232977588,0 -27.30683546440795,38.75794246406895,0 -27.30700326099136,38.75811421257242,0 -27.30715717013305,38.7582796560836,0 -27.30729821376761,38.75843989955551,0 -27.30736720806526,38.75852204050614,0 -27.30743295903013,38.7586030823295,0 -27.30749553234973,38.75868310603907,0 -27.30755497936512,38.75876217735771,0 -27.30761135302198,38.7588403674343,0 -27.30766468048332,38.75891771471644,0 -27.30771499336947,38.75899426509783,0 -27.30776231709833,38.75907005728989,0 -27.30780670428931,38.75914517985082,0 -27.30784813873168,38.75921960992172,0 -27.30788663641188,38.75929337624208,0 -27.30792221029681,38.7593665036858,0 -27.3079548730837,38.75943901872542,0 -27.30798463233354,38.7595109385547,0 -27.30801149598416,38.75958228237646,0 -27.3080354704009,38.75965306711952,0 -27.30805056992167,38.75970417154984,0 -27.30806344859818,38.75975603612999,0 -27.30807411125304,38.75980868023918,0 -27.3080825622896,38.75986212557235,0 -27.30808880507407,38.7599163921162,0 -27.30809284312856,38.75997150873668,0 -27.30809467849147,38.76002750304365,0 -27.30809431220689,38.76008440647684,0 -27.30809174716656,38.76014220353694,0 -27.30808698229231,38.76020098033313,0 -27.30808001424748,38.76026077833437,0 -27.30807083741816,38.7603216459009,0 -27.30805944598858,38.76038362514742,0 -27.3080458272848,38.76044678785581,0 -27.30802996678759,38.76051120157688,0 -27.30801184442924,38.76057694796232,0 -27.30796824260656,38.76071416701091,0 -27.30791499072983,38.76085819703514,0 -27.30785161886437,38.76101032692751,0 -27.30777713332567,38.76117295024906,0 -27.30769839744519,38.76133291679327,0 -27.30760603528125,38.76151078418746,0 -27.30750763525837,38.76169338127941,0 -27.30723333050571,38.76219382258102,0 -27.30715251872845,38.76234588026244,0 -27.30708257821468,38.76248211871372,0 -27.30700649714876,38.7626377773225,0 -27.30694032176247,38.76278261961635,0 -27.3068827637663,38.76291947233845,0 -27.30683323240585,38.76304975603642,0 -27.30680607083626,38.76312861474868,0 -27.30678183559412,38.76320551200624,0 -27.30676047440233,38.76328061398002,0 -27.30674195046741,38.76335405045899,0 -27.30672622983282,38.76342596099772,0 -27.30671329850877,38.76349641547792,0 -27.30670314086454,38.76356549931391,0 -27.30669574656278,38.76363328319771,0 -27.30669110372188,38.76369992997387,0 -27.30668922159806,38.76376539291217,0 -27.30669009875794,38.76382972280076,0 -27.30669373582664,38.76389296316717,0 -27.30670013582815,38.76395515984216,0 -27.30670930220889,38.76401634245344,0 -27.30672123991052,38.76407654387115,0 -27.30673595467178,38.76413579293664,0 -27.30676075540928,38.76422174349988,0 -27.30678833327423,38.76430870690597,0 -27.30681865957476,38.76439659263611,0 -27.30685170120112,38.76448530469924,0 -27.30688742345467,38.76457474935175,0 -27.3069257829828,38.76466481750356,0 -27.3069667343613,38.76475540247163,0 -27.30701022719893,38.76484639276338,0 -27.30705622701834,38.76493771312762,0 -27.30710465660998,38.76502920733051,0 -27.3071554525974,38.76512075562435,0 -27.30720854673704,38.76521223499898,0 -27.30726386870437,38.765303524093,0 -27.30732134036853,38.76539449379085,0 -27.30738088165464,38.7654850173392,0 -27.30744240857249,38.76557496703588,0 -27.30750586959643,38.76566426466604,0 -27.3075711408212,38.76575273307694,0 -27.30763812920362,38.76584024616028,0 -27.30770673948775,38.76592667947475,0 -27.30777687324323,38.76601190910048,0 -27.30784843306269,38.76609581674017,0 -27.3079213190408,38.76617828525792,0 -27.30799543114755,38.76625920147926,0 -27.30807064377989,38.76633842969868,0 -27.30814688117418,38.76641589151366,0 -27.3082240433346,38.76649148533473,0 -27.30830203209608,38.7665651150033,0 -27.30838074561309,38.76663668459083,0 -27.30846009270435,38.76670611141325,0 -27.30853997905371,38.76677331296051,0 -27.30862031360081,38.76683821264509,0 -27.30871290556638,38.76690991565523,0 -27.30880862743349,38.76698096889088,0 -27.30890733965069,38.76705126875722,0 -27.30900889576608,38.76712071094686,0 -27.30911314598149,38.76718919295652,0 -27.30921993148838,38.76725661039104,0 -27.30932909092516,38.76732286137722,0 -27.30944045902461,38.76738784560953,0 -27.30955385686738,38.76745145904052,0 -27.30966912405543,38.76751361203635,0 -27.30978608803547,38.76757421156102,0 -27.30990457611635,38.76763316814719,0 -27.31002441043255,38.76769039342909,0 -27.31014542325902,38.76774580744456,0 -27.31026744288493,38.76779933157459,0 -27.31039030103093,38.76785089201262,0 -27.31051337526814,38.76790024030744,0 -27.31063695548818,38.76794750537602,0 -27.31076088316155,38.76799262659917,0 -27.31088500568348,38.76803554842683,0 -27.31100916532381,38.76807621654059,0 -27.31113322654721,38.76811458677087,0 -27.3112570491709,38.76815061577504,0 -27.31138050021669,38.76818426487361,0 -27.31150337985579,38.76821548156893,0 -27.31162563690209,38.76824425483507,0 -27.31174715289645,38.76827055680599,0 -27.31186781673893,38.76829436344789,0 -27.31198751373386,38.76831565235406,0 -27.31210615077125,38.7683344071888,0 -27.31222363096513,38.76835061264826,0 -27.31233986421966,38.76836425631735,0 -27.31248373479808,38.76837751774738,0 -27.31263191472214,38.76838699690354,0 -27.3127844797626,38.76839269869677,0 -27.31294152818996,38.76839462684961,0 -27.31310313132094,38.76839278375812,0 -27.31326947659889,38.76838716874142,0 -27.31344073594704,38.76837777615171,0 -27.31361714693621,38.7683645930735,0 -27.31379728142989,38.76834777358976,0 -27.31398314071118,38.76832717657536,0 -27.31417519777646,38.76830275014768,0 -27.31437419650553,38.76827440003954,0 -27.31458007622947,38.76824215675438,0 -27.31479539413721,38.76820564026399,0 -27.31502228654387,38.76816449333446,0 -27.31526594097234,38.76811777722784,0 -27.31541901305062,38.76808642260286,0 -27.3155731265109,38.76805226488339,0 -27.31572823550897,38.76801531422414,0 -27.31588429051696,38.76797558241801,0 -27.3160412446073,38.76793308129803,0 -27.31619903781926,38.76788782698711,0 -27.31635761252337,38.76783983600532,0 -27.3165169063714,38.76778912721444,0 -27.31667690748455,38.76773570315756,0 -27.31683749345566,38.76767960347328,0 -27.31699859165319,38.76762085352517,0 -27.317160123439,38.76755948198215,0 -27.31732201484955,38.76749551676337,0 -27.31748417015378,38.76742899551226,0 -27.31764649797915,38.76735995570037,0 -27.31780889943216,38.7672884393766,0 -27.31797200160579,38.76721415387868,0 -27.31813496268256,38.76713746607797,0 -27.318297666744,38.76705843050861,0 -27.31845998855712,38.76697710798908,0 -27.3186218109091,38.7668935569483,0 -27.31878298234782,38.7668078552887,0 -27.31894335934632,38.76672007930998,0 -27.31910278758429,38.76663031345445,0 -27.31926123611301,38.76653857206279,0 -27.31941840530409,38.76644502551278,0 -27.31957412077799,38.76634977757085,0 -27.31972819661527,38.76625294193703,0 -27.31988045853163,38.76615462772175,0 -27.32003068958594,38.76605497457138,0 -27.32017868545092,38.7659541179962,0 -27.32032423117826,38.76585220445278,0 -27.32044750550693,38.76576147217335,0 -27.32056723037704,38.76566681724771,0 -27.32068345684775,38.76556819934388,0 -27.32079623992441,38.76546557182277,0 -27.32090562817344,38.76535889126875,0 -27.32101169006516,38.76524809170242,0 -27.32111448745334,38.76513310857301,0 -27.32121408810705,38.76501386613766,0 -27.32131045798749,38.7648904184483,0 -27.32140378390396,38.76476253991993,0 -27.32149414464332,38.76463012273082,0 -27.32158162873775,38.76449303726201,0 -27.32166630937017,38.76435117209173,0 -27.32174831102454,38.76420432199872,0 -27.3218277431091,38.7640522913743,0 -27.32190473375432,38.76389483525134,0 -27.32197255068331,38.76374713420204,0 -27.32203859283376,38.76359448083861,0 -27.32210298905208,38.76343657789638,0 -27.32216589794238,38.76327303691451,0 -27.32222742670992,38.76310359544767,0 -27.32228786585381,38.76292746982053,0 -27.32234746384808,38.76274393812048,0 -27.32240656905216,38.76255192907674,0 -27.32245803349019,38.76237651873659,0 -27.32250985330303,38.76219222742156,0 -27.32256253168384,38.76199727382331,0 -27.32261699246375,38.76178824324965,0 -27.32271946609894,38.7613779100693,0 -27.32290883098726,38.76059329733825,0 -27.3229871554374,38.76027435799524,0 -27.32307097063151,38.75994536158395,0 -27.323149656032,38.75965179543169,0 -27.32324435172032,38.75932090672114,0 -27.32329157924206,38.75916537886091,0 -27.3233390523308,38.7590153769401,0 -27.32338702446641,38.75887011270974,0 -27.32343557927791,38.75872934572402,0 -27.32348484703855,38.75859269864037,0 -27.32353493098638,38.7584598855554,0 -27.32359849622748,38.75829969201656,0 -27.32366362111152,38.75814466026231,0 -27.32373044286995,38.75799446395842,0 -27.32379907443158,38.75784884970456,0 -27.3238696447552,38.75770754809628,0 -27.3239422229402,38.75757042491645,0 -27.32401689522943,38.75743731736788,0 -27.32409373663352,38.75730809190586,0 -27.324172935465,38.75718244830276,0 -27.32425444625009,38.7570604747177,0 -27.32433833114737,38.75694207820453,0 -27.32442464600031,38.75682718002199,0 -27.32451345281618,38.75671569853517,0 -27.32460479380282,38.75660758164723,0 -27.32469871728178,38.75650277219823,0 -27.32479526758754,38.75640122075524,0 -27.32488100291035,38.75631556014725,0 -27.32496990543262,38.75623044330306,0 -27.32506201856299,38.75614582863855,0 -27.32515739270956,38.75606166982861,0 -27.3252560739549,38.75597792574196,0 -27.32535813481368,38.75589453439175,0 -27.32546364553608,38.75581143834242,0 -27.32557268934565,38.75572857202041,0 -27.32568518572596,38.75564599000676,0 -27.32580140499065,38.75556348748388,0 -27.32592146788664,38.75548097867442,0 -27.32604552211931,38.75539836202427,0 -27.32617368938493,38.75531555514374,0 -27.32630621579472,38.75523239773982,0 -27.32644333346216,38.75514874404173,0 -27.32658534254948,38.75506441082946,0 -27.32682235058876,38.75492825332195,0 -27.32707464692486,38.75478869591759,0 -27.3273448669317,38.75464427439906,0 -27.32763831384883,38.75449215136052,0 -27.32789718584015,38.75436109959527,0 -27.32818785838519,38.75421651091519,0 -27.32915375963404,38.75374380257849,0 -27.32950780437846,38.75356894388884,0 -27.32985173314857,38.75339577350547,0 -27.33015863997624,38.75323710983795,0 -27.33046858849378,38.75307149772042,0 -27.33075491587092,38.75291233359457,0 -27.33102212510924,38.75275711095749,0 -27.33127259439737,38.75260444163146,0 -27.33150661556059,38.75245422556203,0 -27.33172713500889,38.75230465308346,0 -27.33183264562132,38.75222989612557,0 -27.3319351040231,38.75215507809787,0 -27.33203459258985,38.75208013882384,0 -27.33213118101209,38.75200502578147,0 -27.33222501123666,38.75192962548866,0 -27.3323160554578,38.75185395709671,0 -27.332404364325,38.7517779784942,0 -27.33248998162095,38.75170165199346,0 -27.33257295233381,38.7516249372482,0 -27.33265330696838,38.75154780580463,0 -27.33273107824164,38.75147022624675,0 -27.3328062948348,38.7513921699509,0 -27.33297222005645,38.75121278676599,0 -27.33313559598567,38.75102876948973,0 -27.33329639545633,38.75084014871111,0 -27.3334545899147,38.75064695791527,0 -27.33361015271769,38.75044922945786,0 -27.33376305110914,38.75024700478974,0 -27.33391325429994,38.75004032461997,0 -27.33406072985807,38.74982923356279,0 -27.33420546973714,38.74961374096397,0 -27.33434741357698,38.74939393447725,0 -27.33448652633926,38.74916986834288,0 -27.33462277104406,38.74894160210628,0 -27.33475611357962,38.74870919255999,0 -27.33488651099826,38.74847271419446,0 -27.33501392335775,38.74823223941953,0 -27.33513830844002,38.74798784789164,0 -27.33525993205386,38.74773897917691,0 -27.33537842446377,38.74748635066382,0 -27.3354937398037,38.7472300601009,0 -27.33560582955951,38.74697021527448,0 -27.33571464962417,38.74670691764565,0 -27.33582014320387,38.74644030382358,0 -27.33592225826942,38.74617050524267,0 -27.33602093984365,38.74589766710191,0 -27.33611618400999,38.74562178983943,0 -27.33620787733991,38.74534319123605,0 -27.33629596145456,38.74506204857713,0 -27.33638037490177,38.74477855791416,0 -27.33646106279946,38.74449290166137,0 -27.33653795387698,38.74420533015627,0 -27.33661098437037,38.743916081729,0 -27.33668008775289,38.74362541972574,0 -27.33674891939893,38.7433129632446,0 -27.33681207919878,38.74299770486907,0 -27.33686950123441,38.74267997356787,0 -27.33692112451545,38.74236010674462,0 -27.33696689449669,38.74203844148136,0 -27.33700676085555,38.74171533042185,0 -27.33704068029413,38.74139112446071,0 -27.33706861573411,38.74106617794394,0 -27.33709053673935,38.74074084411679,0 -27.3371064190628,38.74041548179821,0 -27.33711624532803,38.74009044705277,0 -27.3371200048384,38.73976609379093,0 -27.33711769359325,38.73944277824093,0 -27.33710931417005,38.73912084321064,0 -27.33709487552445,38.7388006323078,0 -27.33707439282942,38.73848248179711,0 -27.33705808146164,38.73827747535049,0 -27.3370395615803,38.73807279128443,0 -27.33701884153448,38.73786852182207,0 -27.33699593025791,38.73766475499048,0 -27.33697083800323,38.73746158128894,0 -27.33694357443912,38.73725907837866,0 -27.33691415036518,38.73705732644281,0 -27.33688257690815,38.73685640174389,0 -27.33684887187483,38.73665641375413,0 -27.33681304182403,38.73645739778831,0 -27.33677509916513,38.7362594227521,0 -27.33673505642856,38.73606255400468,0 -27.33669292731695,38.73586685859954,0 -27.33664872414675,38.735672393448,0 -27.33660246027052,38.73547921727702,0 -27.33655414900613,38.73528738568058,0 -27.33650386151059,38.73509716527721,0 -27.33645155828434,38.73490839137428,0 -27.33639725306195,38.73472111353166,0 -27.33634095943201,38.73453537859977,0 -27.336282691973,38.73435123450885,0 -27.33622246356686,38.7341687218055,0 -27.33616028799474,38.73398788224279,0 -27.33609617881761,38.73380875525456,0 -27.33603015661618,38.7336313972414,0 -27.33596222835032,38.73345582582767,0 -27.33589240757628,38.73328207604521,0 -27.33582070758372,38.73311018095889,0 -27.33574714247613,38.73294017428143,0 -27.3356717246508,38.73277208456575,0 -27.3355944672622,38.7326059411253,0 -27.33551538317213,38.73244177161442,0 -27.33537515927538,38.73216019570431,0 -27.33523285411217,38.73188333929691,0 -27.33508850348251,38.73161127202397,0 -27.33494214098797,38.73134405719907,0 -27.33479380255838,38.7310817601436,0 -27.33464351592115,38.73082442961314,0 -27.3344913110647,38.73057211694206,0 -27.33433721592682,38.73032486842879,0 -27.3341812804017,38.73008276236855,0 -27.3340235078743,38.72984580227615,0 -27.33386392321416,38.72961402549349,0 -27.3337025496595,38.72938746576082,0 -27.33353941188545,38.72916615757482,0 -27.33337452927462,38.72895012708457,0 -27.3332079226645,38.72873940158452,0 -27.33303961162218,38.7285340058159,0 -27.33286973159759,38.72833409750352,0 -27.33269818661428,38.7281395562128,0 -27.33252499433167,38.72795040196546,0 -27.33235017141825,38.72776665296086,0 -27.33217373541939,38.72758832756423,0 -27.33199570064258,38.72741544016076,0 -27.33181608228539,38.72724800550483,0 -27.33163489475768,38.727086037025,0 -27.33145216085477,38.72692955461085,0 -27.3312678855484,38.72677856203593,0 -27.33108208207226,38.72663307014093,0 -27.33089476302712,38.72649308878982,0 -27.3307059415867,38.72635862778418,0 -27.3305156288206,38.72622969496386,0 -27.33032383637834,38.72610629821902,0 -27.33013057539149,38.72598844470929,0 -27.32999737893864,38.7259109671496,0 -27.32986057720143,38.72583443891674,0 -27.32972015154869,38.72575884958273,0 -27.32957608056013,38.72568418761256,0 -27.32942834464853,38.72561044275003,0 -27.32927691379268,38.72553759990738,0 -27.32912175917076,38.72546564521264,0 -27.32896284726587,38.7253945631152,0 -27.32880019998478,38.72532436205069,0 -27.32863371935168,38.72525499840095,0 -27.32846335925827,38.72518645294317,0 -27.32828906520422,38.72511870373857,0 -27.32811078973736,38.72505173209574,0 -27.32792845047477,38.72498550682738,0 -27.32774196969369,38.72491999968455,0 -27.32755125329373,38.72485517759488,0 -27.3273589227182,38.72479188769156,0 -27.32716224964321,38.72472918947872,0 -27.32696109855851,38.72466703972052,0 -27.32675529973684,38.72460538594745,0 -27.326329066219,38.72448335820399,0 -27.32588131731447,38.72436246614104,0 -27.32541326224352,38.72424294379332,0 -27.32491567405137,38.72412234991164,0 -27.32438126124057,38.72399888963227,0 -27.32378655635469,38.72386713350691,0 -27.32363177607479,38.72383453877467,0 -27.32347609074421,38.7238039481194,0 -27.32331948419794,38.72377535836353,0 -27.32316193933381,38.72374876638374,0 -27.32300343965744,38.72372416937231,0 -27.32284396544666,38.72370156424516,0 -27.32268349750688,38.72368094827984,0 -27.32252201544143,38.72366231885449,0 -27.32235951109288,38.72364567477754,0 -27.32219594938995,38.72363101220803,0 -27.32203130724214,38.72361832907401,0 -27.3218655599907,38.72360762347407,0 -27.32169868404228,38.72359889384765,0 -27.3215306502629,38.72359213863433,0 -27.32136143042871,38.72358735669697,0 -27.3211909942205,38.72358454717644,0 -27.32101950724165,38.72358370938374,0 -27.32084674157003,38.72358483881295,0 -27.32067266217989,38.72358793568978,0 -27.32049723116795,38.7235930006855,0 -27.32032041269619,38.72360003477287,0 -27.32014216042749,38.72360903973399,0 -27.31996242974487,38.72362001781842,0 -27.3197811719345,38.72363297199765,0 -27.31959838378807,38.7236479017691,0 -27.31941396267471,38.7236648147903,0 -27.31922785017922,38.72368371641232,0 -27.31903998181014,38.72370461317941,0 -27.31865871507278,38.72375242164267,0 -27.31826952660854,38.72380831971321,0 -27.31791430304314,38.72386522463682,0 -27.31755154095333,38.7239287785637,0 -27.3171805270144,38.72399910613184,0 -27.31680033901887,38.72407638189766,0 -27.31641035585089,38.72416072327939,0 -27.31600874480218,38.72425251818434,0 -27.31559383894919,38.724352146542,0 -27.31516318190919,38.72446019747736,0 -27.31477477934394,38.72456126239784,0 -27.31436909921534,38.72467004871478,0 -27.3139421988853,38.7247876103091,0 -27.31348655415444,38.72491601755182,0 -27.31259921978094,38.7251725077975,0 -27.31091380031485,38.72566922860457,0 -27.31022851912393,38.72586924731851,0 -27.30951898277555,38.7260720057518,0 -27.30888149746206,38.72624860731137,0 -27.30851248139619,38.72634776839291,0 -27.3081575257373,38.72644066677385,0 -27.30781423191104,38.72652792973404,0 -27.3074810192471,38.72660995833344,0 -27.3071561400849,38.72668717729278,0 -27.30683905366695,38.72675970938139,0 -27.30652891316471,38.72682774814977,0 -27.3062250719246,38.72689143525088,0 -27.30585601686636,38.72696457775169,0 -27.30549490941687,38.72703137820324,0 -27.30514099524969,38.7270919759567,0 -27.30479368145201,38.72714647228597,0 -27.30445232810888,38.72719496509181,0 -27.30411661077131,38.72723749788381,0 -27.30378613349012,38.72727412073238,0 -27.303460566783,38.72730487003688,0 -27.30313914913839,38.72732980598536,0 -27.30282209314631,38.72734890016286,0 -27.30250915868251,38.72736216697717,0 -27.30220013886602,38.72736961513654,0 -27.30189481477778,38.72737124915209,0 -27.30159304383591,38.72736706900627,0 -27.30129466744197,38.72735707246883,0 -27.30099954568566,38.72734125481411,0 -27.30075080996653,38.72732304990708,0 -27.30049690960472,38.72729987400064,0 -27.3002373119531,38.72727167879446,0 -27.29997131991484,38.72723838881565,0 -27.29969848742821,38.72719995698453,0 -27.29941737791693,38.72715618930634,0 -27.29912669164563,38.72710688453308,0 -27.29882445782601,38.7270517091038,0 -27.29856902759302,38.72700231471538,0 -27.29830218024436,38.72694833724012,0 -27.29802119212992,38.72688922851636,0 -27.29772072933631,38.72682386784229,0 -27.2971586365929,38.7266971893871,0 -27.29577056820379,38.72637709027708,0 -27.29538428158009,38.72629073073968,0 -27.29503644276771,38.72621553127284,0 -27.29465866146851,38.72613748947812,0 -27.29430459798468,38.72606858938831,0 -27.29396800946084,38.72600761874635,0 -27.29364562941101,38.72595399106949,0 -27.29328750610961,38.72590061990491,0 -27.29294232856062,38.72585609668575,0 -27.2927739180653,38.72583706479714,0 -27.29260805568352,38.72582015923787,0 -27.29244456669637,38.72580536222758,0 -27.29228330378907,38.72579266046654,0 -27.2921239383236,38.72578203159132,0 -27.29196655002912,38.7257734844921,0 -27.29181102927965,38.72576701323202,0 -27.29165728073342,38.72576261386293,0 -27.29150520369577,38.72576028374131,0 -27.29135473086874,38.72576002207811,0 -27.29120578796166,38.72576182875469,0 -27.29105830896328,38.72576570458364,0 -27.29081649125702,38.72577556579255,0 -27.29057226708084,38.72578906539381,0 -27.29032556872154,38.72580620711812,0 -27.29007632013867,38.72582699623814,0 -27.28982445213377,38.72585143828057,0 -27.28956986255033,38.72587954291821,0 -27.28931245459379,38.72591132081758,0 -27.28905211771119,38.72594678561035,0 -27.28878891664821,38.72598592505131,0 -27.28852253692995,38.72602878252289,0 -27.28825283271201,38.72607538145857,0 -27.28797963348519,38.72612575129198,0 -27.28770279254455,38.72617991840001,0 -27.28742205495431,38.72623793200783,0 -27.28713718294229,38.72629984119244,0 -27.28684788871676,38.72636570844993,0 -27.28656405700052,38.7264331325072,0 -27.28627545523631,38.72650439752658,0 -27.28598169369626,38.72657959963906,0 -27.28568227811304,38.72665886529337,0 -27.28537685297784,38.72674228593674,0 -27.28506449311431,38.7268301116877,0 -27.28474435735074,38.72692257875831,0 -27.28441526901985,38.72702002680343,0 -27.28408781432375,38.72711920050472,0 -27.28374881889083,38.72722397443636,0 -27.28302517101993,38.72745375241377,0 -27.2822304127631,38.72771346251459,0 -27.28116519384512,38.72806824691281,0</coordinates></LinearRing></outerBoundaryIs>
        </Polygon>
        <Polygon>
          <extrude>0</extrude>          <altitudeMode>clampToGround</altitudeMode>
          <outerBoundaryIs><LinearRing><coordinates> -28.19973663267642,38.43466092463662,0 -28.19962715495675,38.43474742300867,0 -28.19951981831757,38.43483809346551,0 -28.19941463639999,38.43493292449082,0 -28.19931162363041,38.4350319030842,0 -28.19921079326172,38.43513501664717,0 -28.1991121622057,38.43524224802272,0 -28.19901574616404,38.43535358015019,0 -28.19892156184062,38.43546899375117,0 -28.19882961004439,38.43558848966327,0 -28.19873992579141,38.43571202425389,0 -28.19865252743431,38.4358395722598,0 -28.1985674346374,38.43597110499842,0 -28.19848466502582,38.43610659557139,0 -28.19840424255327,38.43624600512073,0 -28.1983261890428,38.43638929584481,0 -28.1982505280809,38.43653642446915,0 -28.19817700247912,38.43668794093402,0 -28.19810593866161,38.43684322409373,0 -28.19803736344215,38.43700221540888,0 -28.19797130611869,38.43716484699983,0 -28.19790779184946,38.43733105810708,0 -28.19784685847739,38.4375007509161,0 -28.1977885394001,38.43767383252335,0 -28.19773287158304,38.43785019331639,0 -28.1976798261824,38.43802994740476,0 -28.19762951876206,38.43821272704899,0 -28.19758199222457,38.43839837661695,0 -28.19753729477852,38.43858670801228,0 -28.19749546454135,38.43877756693258,0 -28.19745656949621,38.43897064985799,0 -28.19742066591963,38.43916567809386,0 -28.19738781795856,38.43936230378976,0 -28.19736664681842,38.43950777214264,0 -28.19734894946966,38.43965537954316,0 -28.19733472993834,38.43980509246767,0 -28.19732399169346,38.43995687445833,0 -28.19731673731992,38.44011069072599,0 -28.19731296904728,38.44026649657582,0 -28.19731268793196,38.44042424867121,0 -28.19731589406579,38.4405838997853,0 -28.19732258859687,38.44074544158001,0 -28.19733276893222,38.4409087801157,0 -28.19734643157451,38.44107385911313,0 -28.19736357144705,38.44124061711769,0 -28.19738418277637,38.44140899608976,0 -28.19740825642329,38.44157891982206,0 -28.1974357820188,38.44175031503289,0 -28.19746674670267,38.44192310156915,0 -28.19750126926626,38.44209784317189,0 -28.1975392230754,38.44227380951491,0 -28.1975805872973,38.44245090393181,0 -28.19762533722354,38.44262902056993,0 -28.19767344829513,38.4428080604153,0 -28.19772488530298,38.44298789127131,0 -28.19777961222596,38.44316838712726,0 -28.19783758727271,38.44334941008349,0 -28.1978988115528,38.44353095271367,0 -28.19796318980247,38.44371272222253,0 -28.19803066416416,38.44389455517334,0 -28.19810116849018,38.44407627323807,0 -28.19817463889934,38.44425771044451,0 -28.1982509866798,38.44443864644901,0 -28.1983301240003,38.44461887301952,0 -28.19841195179611,38.44479816447205,0 -28.19853255711274,38.44505284403666,0 -28.1986551362841,38.4453025637104,0 -28.19877964014871,38.44554722336915,0 -28.19890602186215,38.44578673097958,0 -28.19903423102361,38.44602099151888,0 -28.19916422968316,38.44624993613103,0 -28.19929597663542,38.44647349227444,0 -28.19942943407549,38.44669159582718,0 -28.19956452914707,38.44690413103649,0 -28.19970126352055,38.44711110380393,0 -28.19983960457679,38.44731246477246,0 -28.19997952233908,38.44750817032919,0 -28.20012098469784,38.44769817582442,0 -28.2002639677276,38.44788244938361,0 -28.20040844531398,38.44806095736322,0 -28.2005543932866,38.44823366991276,0 -28.20070161612917,38.44840036879061,0 -28.20085026066914,38.44856123324419,0 -28.20100030565485,38.44871624028303,0 -28.20115173127031,38.44886536944469,0 -28.20130451653242,38.44900860018691,0 -28.20145864494596,38.44914591716812,0 -28.20161409881755,38.44927730463073,0 -28.20177086154011,38.44940274854488,0 -28.20192890546389,38.44952222754291,0 -28.20208822650782,38.44963573929191,0 -28.20224880969035,38.44974327312217,0 -28.2024106408709,38.44984481956905,0 -28.20257370520664,38.44994036938328,0 -28.20273799054183,38.45002991550619,0 -28.20290348400341,38.45011345092438,0 -28.20307017338175,38.45019096947814,0 -28.20319445730772,38.45024484615836,0 -28.20332252898443,38.45029746001214,0 -28.20345430167646,38.45034877539196,0 -28.20358967964731,38.45039875500165,0 -28.20372857018846,38.45044736435339,0 -28.2038708536624,38.45049456132206,0 -28.20401641250533,38.45054030689441,0 -28.20416511802122,38.45058456060936,0 -28.20431693225029,38.4506273088393,0 -28.20447161400454,38.45066848138517,0 -28.20462900860052,38.45070803705753,0 -28.20478894842782,38.45074593371749,0 -28.20495127111413,38.45078213261653,0 -28.20511577618411,38.45081658877614,0 -28.20528226799172,38.45084926120171,0 -28.2054505373082,38.45088010881835,0 -28.20562127908827,38.45090924174721,0 -28.2057933655551,38.45093645040927,0 -28.2059665567727,38.45096169685401,0 -28.20614060031014,38.45098494426935,0 -28.20631524929868,38.45100615946259,0 -28.20649022341774,38.45102530816432,0 -28.20666524912842,38.45104236042896,0 -28.20684004443978,38.4510572887716,0 -28.20701438833326,38.45107007315113,0 -28.2071879260167,38.45108068638117,0 -28.20736036598811,38.45108911062963,0 -28.20753141466386,38.45109533154801,0 -28.20770078119522,38.45109933852866,0 -28.20786817324812,38.45110112462363,0 -28.20803330340695,38.4511006867689,0 -28.20819588938919,38.4510980257138,0 -28.20840757926084,38.45108974543231,0 -28.20862072671033,38.45107478486966,0 -28.20883540285186,38.45105313906563,0 -28.20905168828449,38.45102479992094,0 -28.20926965500283,38.45098975864418,0 -28.20948941424702,38.45094799798399,0 -28.20971107043353,38.4508994981496,0 -28.20993474447251,38.45084423272934,0 -28.21016033106761,38.45078223754035,0 -28.21038821261472,38.45071341718789,0 -28.21061855312736,38.45063772223284,0 -28.21085154847221,38.4505550883866,0 -28.21108736001284,38.45046546052478,0 -28.21132629870642,38.45036872251404,0 -28.21156865109019,38.45026475854169,0 -28.2118147764129,38.45015341465297,0 -28.21204011471503,38.45004661599388,0 -28.21226922045992,38.44993349928543,0 -28.21250251650245,38.44981385604564,0 -28.21274056075033,38.44968740037861,0 -28.21298369721159,38.44955395778185,0 -28.21323309975835,38.44941289190523,0 -28.21348982006097,38.44926360898415,0 -28.21375546862404,38.44910517319686,0 -28.21397252196061,38.44897302329678,0 -28.21419803309138,38.44883343134332,0 -28.214684486652,38.44852566679202,0 -28.21516978615589,38.44821198528937,0 -28.21639917534362,38.44740921092589,0 -28.21675374673083,38.44718146481265,0 -28.21706969558418,38.44698222156561,0 -28.21737282941588,38.44679200183192,0 -28.21766606092145,38.4466057552233,0 -28.21795049191107,38.4464227817007,0 -28.21822688117311,38.44624259281231,0 -28.21849606303,38.4460646419405,0 -28.21875832118598,38.44588873872421,0 -28.2190140740752,38.44571460242599,0 -28.219263642501,38.44554201450924,0 -28.21950792215996,38.44537034511272,0 -28.2197464996743,38.44519987401863,0 -28.21997957919055,38.44503045531698,0 -28.22020732604621,38.44486196877849,0 -28.22042991632048,38.44469428357185,0 -28.22064744629689,38.44452732657588,0 -28.22086002889542,38.44436101109996,0 -28.2210677586761,38.44419526313669,0 -28.22127191756358,38.44402903022397,0 -28.22147132830438,38.44386324054805,0 -28.22166605984958,38.44369783676816,0 -28.22185617116541,38.44353276878115,0 -28.22204172382317,38.44336798290179,0 -28.22222275743278,38.44320344372154,0 -28.22239931558477,38.44303911161116,0 -28.22257143612618,38.44287495133265,0 -28.22273919144584,38.44271089246652,0 -28.22290257307237,38.44254694188172,0 -28.22306160960766,38.44238307086933,0 -28.22321632614641,38.44221925356317,0 -28.22336674848956,38.44205546252756,0 -28.22351289467871,38.44189167799632,0 -28.22365478392192,38.44172787843737,0 -28.22379243319456,38.44156404424754,0 -28.22400521473961,38.44130478674836,0 -28.22420638853707,38.4410555666956,0 -28.22439782194488,38.44081406946514,0 -28.2245805608432,38.44057897332147,0 -28.22475577110039,38.44034876405144,0 -28.22492363951507,38.44012318093991,0 -28.22508461708315,38.43990161758801,0 -28.22523901733382,38.43968364196653,0 -28.22538786915241,38.43946775629829,0 -28.22553054178212,38.43925482806903,0 -28.22566720608923,38.43904460212451,0 -28.22579799129675,38.43883687948903,0 -28.22592303342278,38.43863144206772,0 -28.22604239444477,38.43842818585338,0 -28.22615615119101,38.43822697993711,0 -28.22626436430667,38.43802771695194,0 -28.22636803272547,38.43782843977346,0 -28.22646615062486,38.4376309574332,0 -28.22655875678238,38.43743519182937,0 -28.22664588239969,38.43724107693632,0 -28.22672755895275,38.43704854178542,0 -28.22680380417713,38.43685754366459,0 -28.22687463762108,38.43666803356445,0 -28.2269400750981,38.43647996912812,0 -28.22700014619617,38.43629325948059,0 -28.22705484330103,38.43610792191809,0 -28.22710417601989,38.43592392385256,0 -28.2271481520146,38.4357412366647,0 -28.22718677844937,38.43555982997052,0 -28.2272200595249,38.43537968332947,0 -28.22724799940625,38.43520077415957,0 -28.22727060122008,38.43502308239066,0 -28.22730883360578,38.43467861141298,0 -28.22733117194593,38.43444611138395,0 -28.22734643316951,38.43423412598294,0 -28.22735423499207,38.43404206685629,0 -28.2273554423961,38.43394730672476,0 -28.22735468112165,38.43385592754315,0 -28.22735194793253,38.43376756463401,0 -28.22734723470164,38.43368196460791,0 -28.22734052376831,38.43359885089382,0 -28.22733180464914,38.43351812520234,0 -28.22732106202086,38.43343964637513,0 -28.22730828086922,38.43336330546119,0 -28.22728868910903,38.43326613152353,0 -28.22726538009462,38.43316806754186,0 -28.22723836362795,38.4330691548118,0 -28.22720765202385,38.43296943846676,0 -28.22717325810138,38.43286896095412,0 -28.22713520081542,38.43276777838254,0 -28.22709350036472,38.43266594450051,0 -28.22704818080915,38.43256351810239,0 -28.22699924135067,38.43246050369255,0 -28.2269467378259,38.43235702464659,0 -28.22689070571437,38.43225315093476,0 -28.22683118626346,38.43214895906094,0 -28.22676821984295,38.43204452042039,0 -28.22670186340602,38.4319399301616,0 -28.22663217425784,38.43183527865276,0 -28.22655921798664,38.43173066442689,0 -28.22648247650276,38.43162539844943,0 -28.22640257334177,38.43152038774977,0 -28.22631959799106,38.43141574998222,0 -28.22623365156718,38.4313116127057,0 -28.22614483148335,38.43120809475865,0 -28.22605326995694,38.43110535101718,0 -28.22595909694203,38.43100352735486,0 -28.22586245700313,38.43090278012647,0 -28.22576337918285,38.43080314645285,0 -28.22566215155238,38.43070492270712,0 -28.22555895272205,38.43060828224545,0 -28.22545397748145,38.43051340752379,0 -28.22534741489202,38.4304204701429,0 -28.22523949864088,38.43032967463132,0 -28.22513045639943,38.43024121257805,0 -28.22502053013937,38.43015528032528,0 -28.22491089286648,38.43007363635714,0 -28.22479624838489,38.42999308005226,0 -28.22467665454208,38.42991365208149,0 -28.22455217720237,38.42983539620948,0 -28.22442287948605,38.42975835253375,0 -28.22428884975037,38.42968257410117,0 -28.22415017512326,38.42960811019968,0 -28.22400695434015,38.42953501387144,0 -28.22385918138568,38.42946328621326,0 -28.22370708185903,38.42939304076944,0 -28.22355078446828,38.42932433701427,0 -28.22339043438927,38.42925723879169,0 -28.22322616860894,38.42919180399549,0 -28.22305817868912,38.4291281094898,0 -28.22288665023299,38.42906622568479,0 -28.22271179120088,38.42900622764258,0 -28.22253192909939,38.42894758961267,0 -28.22234914494213,38.42889103747687,0 -28.22216370711842,38.42883665431809,0 -28.2219759134658,38.42878452752542,0 -28.22178604469786,38.42873473580882,0 -28.22159447770955,38.42868737878723,0 -28.22140157331907,38.42864254570636,0 -28.22120772507404,38.42860032807819,0 -28.22101302822229,38.4285607535142,0 -28.22081823717327,38.42852398221028,0 -28.22062380801919,38.42849010030958,0 -28.22043022561025,38.42845919235079,0 -28.22023795531246,38.42843133333147,0 -28.22004754478769,38.42840660330921,0 -28.21985951689815,38.42838507022293,0 -28.21967440828418,38.42836679556553,0 -28.21951666330372,38.42835551084808,0 -28.2193583118226,38.42835020424903,0 -28.21919928204439,38.42835087332905,0 -28.21903949404333,38.42835751839468,0 -28.21887887529128,38.42837014178212,0 -28.21871731992854,38.42838875113937,0 -28.21855472812578,38.42841335791197,0 -28.21839098640831,38.42844397922656,0 -28.21822616395095,38.4284805921135,0 -28.21805993534537,38.42852325891447,0 -28.2178921523232,38.42857201759239,0 -28.21772264127496,38.42862691851981,0 -28.21755125505631,38.42868800726578,0 -28.21737773043665,38.42875537561297,0 -28.21720182318416,38.42882911819109,0 -28.21702323381212,38.42890936039673,0 -28.21686112543353,38.42898667584509,0 -28.21669631408832,38.42906944030248,0 -28.21652847094782,38.42915781864392,0 -28.21635717400253,38.42925203288481,0 -28.21618213635312,38.42935223402406,0 -28.21600253115356,38.42945888886056,0 -28.21581760907242,38.4295724415417,0 -28.21562627486166,38.4296935640622,0 -28.2154532304923,38.42980597036713,0 -28.21527287857231,38.42992569122175,0 -28.21508346075326,38.43005389119166,0 -28.214881647099,38.43019282268264,0 -28.21448713447944,38.43046960417951,0 -28.21372929690075,38.43100913676922,0 -28.21341717176502,38.43122968405495,0 -28.21309232073223,38.43145551321347,0 -28.21279918277932,38.43165454826769,0 -28.21246428190009,38.43187471624985,0 -28.21230468066329,38.43197642160951,0 -28.21214921886713,38.43207324222008,0 -28.21199708912359,38.43216567632977,0 -28.21184804249737,38.43225387041212,0 -28.21170168707743,38.4323380562394,0 -28.21155772297271,38.43241840614076,0 -28.21138255833125,38.4325127087865,0 -28.21121024398519,38.43260158510772,0 -28.21104042934058,38.43268521578271,0 -28.21087283769894,38.43276373688617,0 -28.21070716814435,38.43283728743413,0 -28.21054326786888,38.43290593324896,0 -28.21038094940408,38.43296975277506,0 -28.21022005604288,38.43302880753834,0 -28.21006021934252,38.4330832237807,0 -28.20990154192097,38.43313295748791,0 -28.20974390774899,38.43317804498633,0 -28.20958721635983,38.43321851496519,0 -28.20943136053914,38.43325439454582,0 -28.20927627030889,38.43328569926042,0 -28.20912186731234,38.43331244490071,0 -28.20896808205116,38.43333464347737,0 -28.20881854449101,38.4333518690505,0 -28.20866464518752,38.43336528957589,0 -28.20850605874022,38.43337493372911,0 -28.20834235588913,38.43338082783783,0 -28.20817326250226,38.43338298985828,0 -28.20799788295479,38.43338143892058,0 -28.20781539981183,38.43337616881497,0 -28.20762456488107,38.43336714414165,0 -28.20746294681387,38.43335704351418,0 -28.2072934388944,38.43334435067533,0 -28.20711430407,38.43332893800923,0 -28.20692212577477,38.43331051273835,0 -28.20656189176809,38.4332721346746,0 -28.20567188298742,38.43317101339662,0 -28.20542554585843,38.43314535110241,0 -28.20520430499471,38.43312449793078,0 -28.20496580617997,38.43310511436017,0 -28.20474326353813,38.4330906508434,0 -28.2045327905832,38.43308085699078,0 -28.20433236239495,38.43307564302518,0 -28.20411316798499,38.43307524642215,0 -28.20390351859039,38.43308080002767,0 -28.20370220210748,38.43309233687423,0 -28.20350840192661,38.43310990516828,0 -28.20332123058449,38.43313359658131,0 -28.20314039183151,38.43316346044225,0 -28.20305220393803,38.43318073020319,0 -28.20296544614346,38.43319956967721,0 -28.20288007632383,38.43321998802092,0 -28.20279605725809,38.43324199414738,0 -28.20257941608811,38.43330372758489,0 -28.2023620692718,38.4333705870175,0 -28.20214508918111,38.43344224240163,0 -28.20192948328671,38.43351836088833,0 -28.20171630682572,38.43359856676761,0 -28.20150635650104,38.43368255709885,0 -28.20130046892568,38.43376999699262,0 -28.2010993876692,38.43386057044987,0 -28.2009045121753,38.43395361786345,0 -28.2007156947224,38.43404917972082,0 -28.20053348677131,38.43414697673433,0 -28.2003583610917,38.43424675494501,0 -28.20019080259773,38.43434823494733,0 -28.20003111759471,38.43445122795176,0 -28.19987963566247,38.43455552122318,0 -28.19973663267642,38.43466092463662,0</coordinates></LinearRing></outerBoundaryIs>
        </Polygon>
        <Polygon>
          <extrude>0</extrude>          <altitudeMode>clampToGround</altitudeMode>
          <outerBoundaryIs><LinearRing><coordinates> -28.28153214190085,38.45055559400434,0 -28.28130857485818,38.45059618645455,0 -28.28108362409079,38.45064043880171,0 -28.2808575341192,38.45068830295151,0 -28.28063055586034,38.45073972579252,0 -28.28040293874856,38.45079465091769,0 -28.28017494563888,38.45085301500299,0 -28.27994683677964,38.45091475143048,0 -28.27971887496295,38.45097978908129,0 -28.27949131498105,38.45104805545203,0 -28.27926442912597,38.45111946904762,0 -28.27903848035835,38.45119394709789,0 -28.27881372980452,38.45127140352889,0 -28.27859043913344,38.45135174809721,0 -28.27836886082741,38.45143488989184,0 -28.27814924674642,38.4515207344018,0 -28.27793184284974,38.45160918547894,0 -28.27771727097743,38.45169998076696,0 -28.27750537503921,38.45179317685505,0 -28.27729638268206,38.45188867360857,0 -28.27709051271483,38.45198637103503,0 -28.27688798525,38.45208616446782,0 -28.27668899596889,38.45218795727378,0 -28.27649374160256,38.45229164880103,0 -28.2763024084778,38.45239714008503,0 -28.27611524505508,38.45250429191393,0 -28.27593234829438,38.45261304650619,0 -28.27575388024371,38.45272330748772,0 -28.27557999233551,38.45283498128364,0 -28.27541083649292,38.45294797002666,0 -28.2752465394887,38.45306218873019,0 -28.27508722918387,38.45317754848737,0 -28.27493302359589,38.45329396382018,0 -28.2748450319039,38.45336362480475,0 -28.2747585890619,38.45343571947061,0 -28.27467365705818,38.45351027949933,0 -28.27459019436642,38.45358734132717,0 -28.27450816406373,38.45366693860154,0 -28.27442751293957,38.45374912250641,0 -28.27434819220192,38.45383394272422,0 -28.27427014745745,38.4539214573868,0 -28.27419341102992,38.4540116229821,0 -28.27411782744028,38.45410461482716,0 -28.27404332994415,38.45420051496698,0 -28.27396984188932,38.45429942201378,0 -28.27389729966519,38.45440141989761,0 -28.27382559056172,38.45450666540793,0 -28.27375461323026,38.45461530712942,0 -28.27368424560398,38.45472753177159,0 -28.27362264717048,38.45482954548741,0 -28.27356130735164,38.45493468933115,0 -28.27343888576039,38.45515526307061,0 -28.27331579652378,38.45539137153234,0 -28.27318989961028,38.45564711170351,0 -28.27307679286417,38.45588802371044,0 -28.27295467424269,38.45615803287478,0 -28.27283502042708,38.45642989240668,0 -28.27252108643381,38.45715239587315,0 -28.27242611370386,38.45736639788191,0 -28.27233927903161,38.45755772918047,0 -28.27223859971561,38.45777308716871,0 -28.2721417795418,38.45797261987727,0 -28.27204697147183,38.45816012886343,0 -28.27195320367927,38.45833752626426,0 -28.27183746131641,38.45854521796673,0 -28.27172112721977,38.45874145867136,0 -28.27160340930664,38.45892758222834,0 -28.27148376177987,38.45910444816748,0 -28.27136154296557,38.45927298058808,0 -28.27123653829087,38.45943345098136,0 -28.27117288261293,38.45951080324046,0 -28.27110841305113,38.45958628837772,0 -28.27104309560896,38.45965994618227,0 -28.27097689954016,38.45973181130856,0 -28.27087982946467,38.45983287134001,0 -28.27077914349069,38.45993315571695,0 -28.27067479238966,38.46003271350094,0 -28.27056671899286,38.4601315992596,0 -28.27045487101157,38.46022986140803,0 -28.27033916621282,38.46032757273864,0 -28.2702195249023,38.46042480059612,0 -28.27009585267266,38.46052162173835,0 -28.26996824045635,38.46061797303325,0 -28.26983638205869,38.46071409345289,0 -28.26970014050429,38.4608100829218,0 -28.26955934826779,38.46090605953032,0 -28.2694138672143,38.46100211907917,0 -28.26926341839137,38.46109844732138,0 -28.2691077386264,38.4611952129108,0 -28.26894648772717,38.46129262741553,0 -28.26867704241358,38.4614497890465,0 -28.26839016324968,38.46161053497195,0 -28.26808285606075,38.46177655078229,0 -28.26774910172795,38.46195109188131,0 -28.26745422985881,38.46210144243491,0 -28.26712312012818,38.46226712906239,0 -28.26601845685434,38.46281034292007,0 -28.26561117221711,38.46301262393473,0 -28.26521398737238,38.46321407271332,0 -28.2648597668897,38.46339897296181,0 -28.26449900965814,38.46359420495638,0 -28.26432945806412,38.46368895211138,0 -28.26416614622446,38.46378233002611,0 -28.26400836146944,38.46387474963994,0 -28.26385585947451,38.46396635769774,0 -28.26370828316311,38.46405736880242,0 -28.26356535826804,38.46414795223745,0 -28.26342406334083,38.46424010060977,0 -28.26328715334557,38.46433209793074,0 -28.26315444494573,38.46442406745284,0 -28.26302578921267,38.46451611245984,0 -28.26290102985238,38.46460834560195,0 -28.26278007828747,38.46470083322982,0 -28.2626628328773,38.46479365309929,0 -28.26254920806032,38.46488687298854,0 -28.26243902819997,38.46498064156366,0 -28.2623323300245,38.46507493229046,0 -28.26222905199769,38.46516979957238,0 -28.26212914116102,38.46526529208224,0 -28.26203254318753,38.46536146209751,0 -28.26193922158567,38.46545834631559,0 -28.26184913720164,38.46555598540176,0 -28.2617622558596,38.46565441641732,0 -28.2615993481244,38.46584129172253,0 -28.26112038877169,38.46638479425109,0 -28.26097240770141,38.46655632949289,0 -28.26084163904814,38.46671146248686,0 -28.2606996756081,38.46688519974009,0 -28.2605710564335,38.46704906065557,0 -28.26045352415132,38.46720592529207,0 -28.26034599120405,38.46735725416031,0 -28.26023874518317,38.46751797366277,0 -28.26014186568873,38.46767440368996,0 -28.26005487321309,38.46782732012515,0 -28.2599774695618,38.46797724979719,0 -28.25994225462958,38.46805131158672,0 -28.25990936263692,38.46812478130988,0 -28.259878774803,38.46819770094943,0 -28.25985047584346,38.46827010698257,0 -28.25982445079113,38.46834203823899,0 -28.25980069060429,38.46841352029497,0 -28.25977918581834,38.46848458165208,0 -28.25975992878982,38.46855524760167,0 -28.25972833667866,38.46868777046764,0 -28.25970085748216,38.46882379833497,0 -28.25967756385431,38.46896297208561,0 -28.25965852230635,38.46910489497326,0 -28.25964378610656,38.46924918217251,0 -28.25963340629005,38.4693953498059,0 -28.25962741630685,38.46954292787722,0 -28.25962583648229,38.4696914176674,0 -28.25962867804358,38.46984047783811,0 -28.25963593524047,38.46998940852865,0 -28.25964758195901,38.47013767348713,0 -28.25966357568478,38.47028473107612,0 -28.25968385741938,38.47043004016018,0 -28.25970835352489,38.47057307409149,0 -28.25973697524235,38.47071331489105,0 -28.2597696212963,38.47085026649774,0 -28.25980425023199,38.4709743365564,0 -28.25984488900155,38.47109967162688,0 -28.25989151193004,38.47122619240845,0 -28.25994408673671,38.47135381120698,0 -28.26000258049152,38.47148244637845,0 -28.26006694298318,38.47161198597064,0 -28.26013712127556,38.47174232334349,0 -28.26021305196992,38.47187334066735,0 -28.26029474547164,38.4720050423602,0 -28.26038204639722,38.4721371653298,0 -28.26047486063797,38.47226956705545,0 -28.26057307827593,38.47240209065294,0 -28.26067659280932,38.47253459085032,0 -28.26078525107712,38.47266687011356,0 -28.2608989001761,38.47279874220526,0 -28.26101736502786,38.47293000388776,0 -28.26114200605316,38.47306205173419,0 -28.26127116527974,38.47319302220047,0 -28.26140460287746,38.47332267199527,0 -28.2615420497439,38.47345073956213,0 -28.2616832457296,38.47357698092393,0 -28.26182784775552,38.47370108780001,0 -28.2619755202075,38.47382277205938,0 -28.26212589684424,38.47394173182805,0 -28.26227881881309,38.4740578307342,0 -28.26243365611262,38.4741705799245,0 -28.26258998188352,38.47427966851234,0 -28.26274734648759,38.4743847826631,0 -28.26290530517943,38.47448562460802,0 -28.26306336870293,38.47458188130055,0 -28.26322105805183,38.4746732610251,0 -28.26337788938889,38.47475948337691,0 -28.26347023852125,38.47480759794501,0 -28.26356473725619,38.47485432699816,0 -28.26366137909861,38.47489966732373,0 -28.26376015709991,38.47494361566091,0 -28.26386106442138,38.47498616895219,0 -28.26396409292592,38.4750273237516,0 -28.26406923454081,38.47506707683355,0 -28.26417648062827,38.47510542493128,0 -28.26428582694956,38.47514236638883,0 -28.26439725930697,38.47517789627203,0 -28.26451076768455,38.47521201138629,0 -28.2646263413604,38.47524470850812,0 -28.26474396986388,38.47527598465698,0 -28.26486364059447,38.47530583646442,0 -28.26498534113112,38.47533426083085,0 -28.26510905816883,38.47536125464768,0 -28.26536262076875,38.47541096317146,0 -28.26562408021274,38.47545490765964,0 -28.26589330367768,38.47549306574008,0 -28.26617013820645,38.47552541569153,0 -28.26645444327397,38.47555194017751,0 -28.26674600477368,38.47557261833708,0 -28.26704461680552,38.47558743550091,0 -28.26735004088381,38.47559637977722,0 -28.26766569404603,38.47559944457231,0 -28.26798774580407,38.47559648789344,0 -28.26831586153474,38.47558751271019,0 -28.26864965058812,38.47557252961887,0 -28.26898876710359,38.47555155210365,0 -28.26933264378326,38.47552461326186,0 -28.26968074807368,38.4754917546578,0 -28.27003245573551,38.47545303507926,0 -28.27038828113151,38.47540837035969,0 -28.27074626189678,38.47535797950305,0 -28.27110554384556,38.47530198250701,0 -28.27146512849237,38.47524053477849,0 -28.27182414851182,38.47517377972849,0 -28.27218116357278,38.47510198038187,0 -28.27253485895405,38.47502540079301,0 -28.27288372841753,38.47494436675456,0 -28.27306662041322,38.4748984161055,0 -28.27325232774612,38.47484780705033,0 -28.27344125068803,38.47479243079632,0 -28.27363391255429,38.474732134169,0 -28.27383064236231,38.47466682229106,0 -28.27403252348753,38.47459614326757,0 -28.27424052884453,38.47451975753832,0 -28.2744561424891,38.47443712078768,0 -28.27479189901124,38.47430235580249,0 -28.27516034843201,38.47414758564464,0 -28.27555366795419,38.47397677681816,0 -28.2763426557828,38.47362751044599,0 -28.27667638787709,38.47348142345502,0 -28.27702766792936,38.47333139788474,0 -28.27734365849255,38.47320128549458,0 -28.27768008671264,38.47306923546024,0 -28.278037790352,38.47293571598545,0 -28.27842054853679,38.47279930806334,0 -28.27883596224337,38.4726572989064,0 -28.27920103702363,38.47253651228058,0 -28.2796109284039,38.47240415966849,0 -28.28096674382581,38.47197618660287,0 -28.28146100105409,38.47181821292791,0 -28.28193841726355,38.47166160148809,0 -28.28236568069951,38.47151644934814,0 -28.28278968829781,38.47136613747355,0 -28.28318327670071,38.47121951526053,0 -28.28337068184217,38.47114683815887,0 -28.28355237517623,38.47107437022412,0 -28.28372876256907,38.47100194948944,0 -28.28390015803294,38.47092944691264,0 -28.28412633253126,38.47083023640322,0 -28.28434429695195,38.4707304107297,0 -28.2845545257983,38.47062975239376,0 -28.28475738463027,38.47052808612634,0 -28.28495326016039,38.47042521567265,0 -28.28514234195275,38.47032103891142,0 -28.28532486035016,38.47021542883908,0 -28.28550100288291,38.47010827682912,0 -28.2856711886777,38.4699993156556,0 -28.28583528993592,38.46988861441349,0 -28.28599343438168,38.46977608688331,0 -28.28614572930499,38.46966165665339,0 -28.28629228498062,38.46954523999521,0 -28.2864331708894,38.46942678080423,0 -28.2865684628746,38.46930621527012,0 -28.28669822585419,38.46918348549409,0 -28.28686493634078,38.46901599456713,0 -28.2870296649597,38.46884052855895,0 -28.28719253345141,38.46865695800207,0 -28.28735369063922,38.46846511532721,0 -28.2875132471956,38.46826487411281,0 -28.28767145908072,38.46805591843523,0 -28.28782855127345,38.46783795173972,0 -28.28798481881387,38.46761056509945,0 -28.28813874962283,38.4673761479381,0 -28.28829264537368,38.46713138383234,0 -28.28844702167575,38.46687545499989,0 -28.28860265792399,38.46660707082732,0 -28.28875951407053,38.46632640142877,0 -28.28892017279445,38.46602892236439,0 -28.2890867025375,38.46571082993172,0 -28.28926425027334,38.46536230267045,0 -28.2894243676682,38.46503813291934,0 -28.28957559651956,38.46471946306112,0 -28.2897181422131,38.4644058598662,0 -28.28985214618854,38.46409701153648,0 -28.28997775682527,38.46379257017426,0 -28.2900950233953,38.46349240995314,0 -28.29020401629463,38.4631963504721,0 -28.29030478662815,38.46290425262718,0 -28.29039746452236,38.46261570965442,0 -28.29048197805,38.46233091325475,0 -28.29055835344917,38.46204977487497,0 -28.29062660995119,38.46177222354482,0 -28.29068676603114,38.46149818191103,0 -28.29071380878868,38.46136246568193,0 -28.29073882967086,38.46122761105916,0 -28.29076182982149,38.46109361181025,0 -28.29078281001026,38.46096046337687,0 -28.29080177100925,38.46082816085522,0 -28.2908187134562,38.4606966997906,0 -28.29084457843835,38.46046618127546,0 -28.29086617910241,38.46023519540792,0 -28.29088348140226,38.46000410666521,0 -28.29089645947942,38.45977326090703,0 -28.29090509379568,38.45954301730444,0 -28.29090937393977,38.45931367097298,0 -28.29090929420848,38.45908552956472,0 -28.29090485474113,38.45885888020595,0 -28.2908960700161,38.45863418414745,0 -28.29088294824009,38.4584115109835,0 -28.29086550398646,38.45819110741621,0 -28.29084375529744,38.45797320093498,0 -28.2908177262442,38.45775802685594,0 -28.29078743948784,38.45754576760398,0 -28.29075292234759,38.4573366144183,0 -28.29071420371705,38.45713074217282,0 -28.2906408945215,38.45677699046797,0 -28.29056421409702,38.45643249663714,0 -28.29048408430721,38.45609691103872,0 -28.29040049223597,38.45577018249967,0 -28.29031341038459,38.45545221379992,0 -28.29022287958926,38.45514316422906,0 -28.29012892042189,38.45484310406926,0 -28.29003155844342,38.45455211508708,0 -28.28993079835536,38.45427021758368,0 -28.28982668864765,38.45399755328414,0 -28.28971925743652,38.45373419579274,0 -28.28960853210739,38.45348021221689,0 -28.28949454237138,38.4532356701636,0 -28.2893773121612,38.45300062044714,0 -28.28931749008212,38.4528866717868,0 -28.28925686744129,38.45277511509778,0 -28.28919544734086,38.45266595608776,0 -28.28913323279691,38.45255920011623,0 -28.28907029610786,38.45245496506905,0 -28.2890065726125,38.45235313776152,0 -28.28894206520307,38.4522537228146,0 -28.28887677668966,38.45215672455829,0 -28.28881070999631,38.45206214732576,0 -28.28874386771324,38.45196999481406,0 -28.28867625254117,38.45188027074593,0 -28.28860786710443,38.45179297860319,0 -28.28853871506875,38.45170812298701,0 -28.28846879794128,38.45162570566927,0 -28.28839811824458,38.45154572962307,0 -28.28832667843364,38.45146819762581,0 -28.28825448105415,38.45139311243267,0 -28.28818152837751,38.45132047639848,0 -28.28810782276534,38.4512502918742,0 -28.28803336651675,38.4511825610487,0 -28.28795816892843,38.45111729194208,0 -28.2878822253541,38.4510544800891,0 -28.28780553800717,38.45099412732007,0 -28.28772810904422,38.45093623533193,0 -28.28764994069622,38.45088080578751,0 -28.28757103497053,38.45082784010502,0 -28.28749139394711,38.45077733968039,0 -28.28741101965479,38.45072930579982,0 -28.28732991480686,38.4506837400474,0 -28.28724808068975,38.45064064310877,0 -28.28716551926236,38.45060001601533,0 -28.28708223243778,38.45056185970825,0 -28.28699822218787,38.45052617508718,0 -28.2869134903029,38.45049296290892,0 -28.28682803863195,38.45046222389802,0 -28.28674186898187,38.45043395870431,0 -28.28663833034706,38.45040331968281,0 -28.28653097464495,38.45037489904455,0 -28.28641980470555,38.45034869753845,0 -28.28630482338417,38.45032471583727,0 -28.28618603376853,38.45030295457787,0 -28.28606343854476,38.45028341424546,0 -28.28593704057331,38.45026609529523,0 -28.285806842533,38.45025099809374,0 -28.28567285229111,38.45023812339763,0 -28.28553506711447,38.45022747079339,0 -28.28539348904767,38.45021904043746,0 -28.28524811943757,38.45021283240882,0 -28.28509896071315,38.45020884677457,0 -28.28494601127907,38.45020708345686,0 -28.28478927025692,38.45020754244213,0 -28.28462873476054,38.45021022373619,0 -28.28446487734015,38.45021511016595,0 -28.28429723588685,38.45022220645551,0 -28.28412580122344,38.45023151298575,0 -28.28395055864491,38.45024303054909,0 -28.28377150107044,38.45025675942291,0 -28.28358859077216,38.45027270231862,0 -28.28340179484749,38.45029086208451,0 -28.2832110636814,38.45031124352947,0 -28.28281834383306,38.45035859526873,0 -28.28240885227371,38.45041492788184,0 -28.28198134398141,38.4504804071041,0 -28.28153214190085,38.45055559400434,0</coordinates></LinearRing></outerBoundaryIs>
        </Polygon>
      </MultiGeometry>
    </Placemark>
  </Folder>
  <Style id="PolyStyle00">
    <LabelStyle>
      <color>00000000</color>
      <scale>0.000000</scale>
    </LabelStyle>
    <LineStyle>
      <color>ff00ffff</color>
      <width>1.500000</width>
    </LineStyle>
    <PolyStyle>
      <color>00f0f0f0</color>
      <outline>1</outline>
    </PolyStyle>
  </Style>
</Document>
</kml>
